# Supplementary material for: Magnetic properties of CrX3 (X = Cl, Br, I) monolayers in excited states
Source: Royal Society of Chemistry journal article supplement (doi:10.1039/d4tc00003j), 2024-01-01
Supplement: d4tc00003j1.pdf [file d4tc00003j1.pdf]

# Magnetic properties of $\text{CrX}_3$ ( $\text{X}=\text{Cl},\text{Br},\text{I}$ ) monolayers in excited states

E-mail:

Prakash Mishra<sup>a, b</sup>, and Tunna Baruah<sup>a, b</sup>

<sup>a</sup> *Department of Physics, University of Texas at El Paso, El Paso, Texas 79968, United States. E-mail: tbaruah@utep.edu*

<sup>b</sup> *Computational Science Program, University of Texas at El Paso, El Paso, Texas 79968, United States.*

Electronic Supplementary Information:

Table S1: Particle-hole state, excitation energy ( $E_{ex}$ , magnetic anisotropy energy (MAE), Dipole moment, Transition dipole moment (TDM), Average spin-charge on Cr sites for  $\text{CrI}_3$  for singly excited states spin conserving particle-hole state.

| Transition            | E (eV) | MAE (K) | Dipole (D) | TDM    | Spin charge (e) |          |        |
|-----------------------|--------|---------|------------|--------|-----------------|----------|--------|
|                       |        |         |            |        | Integrated      | Mulliken | Lowdin |
| H $\rightarrow$ L     | 2.24   | 60.60   | 11.64      | 0.1532 | 2.9809          | 3.5103   | 3.1495 |
| H $\rightarrow$ L+1   | 1.34   | 63.63   | 0.91       | 0.2795 | 2.9790          | 3.5093   | 3.1482 |
| H $\rightarrow$ L+2   | 1.50   | 72.81   | 3.37       | 0.0385 | 2.9791          | 3.5098   | 3.1491 |
| H $\rightarrow$ L+3   | 1.45   | 66.34   | 2.13       | 0.2517 | 2.9790          | 3.5098   | 3.1497 |
| H $\rightarrow$ L+4   | 1.50   | 64.41   | 2.81       | 0.2432 | 2.9789          | 3.5091   | 3.1499 |
| H $\rightarrow$ L+5   | 1.61   | 82.87   | 4.63       | 0.1699 | 2.9763          | 3.5058   | 3.1469 |
| H $\rightarrow$ L+6   | 1.46   | 61.50   | 3.24       | 0.1171 | 2.9755          | 3.5055   | 3.1459 |
| H $\rightarrow$ L+7   | 2.24   | 139.76  | 4.36       | 0.7114 | 2.9848          | 3.5169   | 3.1564 |
| H $\rightarrow$ L+8   | 1.63   | 83.53   | 3.23       | 0.1015 | 2.9747          | 3.5053   | 3.1459 |
| H $\rightarrow$ L+9   | 2.65   | 36.71   | 13.59      | 0.0100 | 2.9721          | 3.5021   | 3.1435 |
| H $\rightarrow$ L+10  | 2.36   | 78.04   | 11.57      | 0.3713 | 2.9726          | 3.5028   | 3.1444 |
| H $\rightarrow$ L+11  | 2.26   | 62.50   | 9.80       | 0.3562 | 2.9715          | 3.5016   | 3.1437 |
| H-1 $\rightarrow$ L   | 1.67   | 73.41   | 7.79       | 0.0941 | 2.9822          | 3.5105   | 3.1509 |
| H-1 $\rightarrow$ L+1 | 1.66   | 69.96   | 2.76       | 0.2357 | 2.9842          | 3.5152   | 3.1541 |
| H-1 $\rightarrow$ L+2 | 1.71   | 80.73   | 4.88       | 0.0186 | 2.9856          | 3.5154   | 3.1559 |
| H-1 $\rightarrow$ L+3 | 1.43   | 64.31   | 1.80       | 0.1080 | 2.9790          | 3.5082   | 3.149  |
| H-1 $\rightarrow$ L+4 | 1.46   | 90.37   | 1.86       | 0.0719 | 2.9792          | 3.5079   | 3.1498 |
| H-1 $\rightarrow$ L+5 | 1.81   | 75.29   | 8.06       | 0.2542 | 2.9812          | 3.5104   | 3.1523 |
| H-1 $\rightarrow$ L+6 | 1.71   | 117.04  | 3.57       | 0.1412 | 2.9875          | 3.5181   | 3.1592 |
| H-1 $\rightarrow$ L+7 | 1.71   | 85.55   | 5.36       | 0.3215 | 2.9778          | 3.5086   | 3.1493 |
| H-1 $\rightarrow$ L+8 | 1.92   | 67.66   | 2.28       | 0.1300 | 2.9774          | 3.5078   | 3.149  |
| H-1 $\rightarrow$ L+9 | 1.65   | 74.60   | 3.81       | 0.0590 | 2.9789          | 3.5098   | 3.152  |

|                        |      |        |       |        |        |        |        |
|------------------------|------|--------|-------|--------|--------|--------|--------|
| H-1 $\rightarrow$ L+10 | 3.97 | 76.16  | 16.77 | 0.1886 | 2.9771 | 3.5068 | 3.1487 |
| H-1 $\rightarrow$ L+11 | 2.33 | 81.91  | 8.72  | 1.1130 | 2.9749 | 3.5034 | 3.1468 |
| H-2 $\rightarrow$ L    | 2.63 | 123.60 | 16.44 | 0.0384 | 3.0043 | 3.5333 | 3.1753 |
| H-2 $\rightarrow$ L+1  | 4.64 | 97.26  | 11.74 | 0.1138 | 2.9883 | 3.5105 | 3.1542 |
| H-2 $\rightarrow$ L+2  | 1.69 | 116.31 | 6.33  | 0.0781 | 2.9940 | 3.5266 | 3.1678 |
| H-2 $\rightarrow$ L+3  | 1.51 | 131.10 | 2.28  | 0.2068 | 3.0007 | 3.5328 | 3.1754 |
| H-2 $\rightarrow$ L+4  | 1.60 | 111.10 | 3.45  | 0.1951 | 2.9995 | 3.5312 | 3.1746 |
| H-2 $\rightarrow$ L+5  | 2.30 | 121.63 | 14.47 | 0.0606 | 2.9962 | 3.5278 | 3.1706 |
| H-2 $\rightarrow$ L+6  | 1.74 | 155.39 | 9.18  | 0.1372 | 2.9895 | 3.5252 | 3.1661 |
| H-2 $\rightarrow$ L+7  | 3.05 | 102.10 | 18.49 | 0.0170 | 2.9981 | 3.5291 | 3.1706 |
| H-2 $\rightarrow$ L+8  | 1.97 | 115.36 | 3.73  | 0.2426 | 2.9965 | 3.5283 | 3.1708 |
| H-2 $\rightarrow$ L+9  | 3.07 | 111.72 | 18.81 | 0.0818 | 2.9974 | 3.5289 | 3.1717 |
| H-2 $\rightarrow$ L+10 | 4.18 | 158.20 | 22.08 | 0.1326 | 2.9988 | 3.5298 | 3.1727 |
| H-2 $\rightarrow$ L+11 | 1.78 | 81.97  | 3.16  | 0.0692 | 2.9897 | 3.5285 | 3.1686 |
| H-3 $\rightarrow$ L    | 2.61 | 118.66 | 15.85 | 0.0995 | 3.0047 | 3.5342 | 3.1762 |
| H-3 $\rightarrow$ L+1  | 1.62 | 121.03 | 0.92  | 0.1116 | 3.0043 | 3.5367 | 3.1774 |
| H-3 $\rightarrow$ L+2  | 2.87 | 117.88 | 14.79 | 0.1175 | 3.0016 | 3.5318 | 3.1734 |
| H-3 $\rightarrow$ L+3  | 1.57 | 121.27 | 2.84  | 0.0768 | 2.9990 | 3.5323 | 3.1748 |
| H-3 $\rightarrow$ L+4  | 1.68 | 101.88 | 7.47  | 0.0245 | 2.9950 | 3.5296 | 3.1727 |
| H-3 $\rightarrow$ L+5  | 1.86 | 105.73 | 7.76  | 0.0959 | 2.9959 | 3.5269 | 3.1697 |
| H-3 $\rightarrow$ L+6  | 2.90 | 86.30  | 11.39 | 0.0304 | 2.9989 | 3.5232 | 3.1663 |
| H-3 $\rightarrow$ L+7  | 2.87 | 119.49 | 15.69 | 0.0435 | 2.9971 | 3.5286 | 3.1701 |
| H-3 $\rightarrow$ L+8  | 1.75 | 92.16  | 1.45  | 0.0831 | 2.9952 | 3.5288 | 3.1711 |
| H-3 $\rightarrow$ L+9  | 2.60 | 82.29  | 12.92 | 0.0877 | 3.0002 | 3.5293 | 3.1733 |
| H-3 $\rightarrow$ L+10 | 3.60 | 97.63  | 16.44 | 0.1745 | 3.0013 | 3.5322 | 3.1755 |
| H-3 $\rightarrow$ L+11 | 2.35 | 134.92 | 7.56  | 0.0183 | 3.0004 | 3.5284 | 3.1735 |

|                        |      |        |       |        |        |        |        |
|------------------------|------|--------|-------|--------|--------|--------|--------|
| H-4 $\rightarrow$ L    | 2.21 | 83.11  | 2.68  | 0.0786 | 3.0041 | 3.5338 | 3.1751 |
| H-4 $\rightarrow$ L+1  | 1.71 | 78.09  | 1.63  | 0.0455 | 2.9996 | 3.5317 | 3.1718 |
| H-4 $\rightarrow$ L+2  | 1.65 | 44.30  | 4.97  | 0.8167 | 2.9799 | 3.5132 | 3.1545 |
| H-4 $\rightarrow$ L+3  | 1.74 | 87.18  | 2.49  | 0.1803 | 3.0015 | 3.5341 | 3.1761 |
| H-4 $\rightarrow$ L+4  | 1.81 | 83.68  | 1.36  | 0.1493 | 3.0028 | 3.5343 | 3.1773 |
| H-4 $\rightarrow$ L+5  | 2.03 | 73.04  | 7.43  | 0.2264 | 2.9965 | 3.5287 | 3.1709 |
| H-4 $\rightarrow$ L+6  | 2.09 | 65.68  | 9.47  | 0.2015 | 2.9940 | 3.5246 | 3.1668 |
| H-4 $\rightarrow$ L+7  | 3.44 | 68.06  | 12.77 | 0.1115 | 2.9966 | 3.52   | 3.1637 |
| H-4 $\rightarrow$ L+8  | 1.93 | 72.20  | 1.81  | 0.1103 | 2.9959 | 3.5276 | 3.1697 |
| H-4 $\rightarrow$ L+9  | 2.11 | 67.54  | 7.36  | 0.1534 | 3.0021 | 3.5385 | 3.179  |
| H-4 $\rightarrow$ L+10 | 3.94 | 62.17  | 17.29 | 0.3176 | 2.9975 | 3.5282 | 3.1709 |
| H-4 $\rightarrow$ L+11 | 1.95 | 74.03  | 7.12  | 0.0847 | 2.9845 | 3.5175 | 3.1603 |
| <hr/>                  |      |        |       |        |        |        |        |
| H-5 $\rightarrow$ L    | 2.25 | 114.96 | 13.66 | 0.1520 | 2.9839 | 3.513  | 3.1533 |
| H-5 $\rightarrow$ L+1  | 1.62 | 97.97  | 4.02  | 0.0703 | 2.9769 | 3.5073 | 3.1468 |
| H-5 $\rightarrow$ L+2  | 1.82 | 97.75  | 5.99  | 0.2253 | 2.9905 | 3.5215 | 3.1618 |
| H-5 $\rightarrow$ L+3  | 1.60 | 111.66 | 2.63  | 0.0951 | 2.9779 | 3.5086 | 3.1494 |
| H-5 $\rightarrow$ L+4  | 1.60 | 87.30  | 2.47  | 0.0718 | 2.9739 | 3.5042 | 3.1457 |
| H-5 $\rightarrow$ L+5  | 1.92 | 116.40 | 8.02  | 0.2118 | 2.9808 | 3.5102 | 3.1521 |
| H-5 $\rightarrow$ L+6  | 1.87 | 134.43 | 5.75  | 0.0230 | 2.9861 | 3.5166 | 3.1579 |
| H-5 $\rightarrow$ L+7  | 2.85 | 103.40 | 14.18 | 0.0830 | 2.9750 | 3.5056 | 3.146  |
| H-5 $\rightarrow$ L+8  | 1.75 | 86.03  | 2.29  | 0.0979 | 2.9714 | 3.5019 | 3.1433 |
| H-5 $\rightarrow$ L+9  | 2.06 | 76.32  | 7.24  | 0.0322 | 2.9826 | 3.5168 | 3.157  |
| H-5 $\rightarrow$ L+10 | 3.42 | 93.40  | 15.17 | 0.1257 | 2.9743 | 3.5042 | 3.1464 |
| H-5 $\rightarrow$ L+11 | 2.87 | 114.17 | 15.62 | 0.0015 | 2.9778 | 3.5082 | 3.151  |
| <hr/>                  |      |        |       |        |        |        |        |
| H-6 $\rightarrow$ L    | 3.00 | 95.31  | 21.71 | 0.1357 | 3.0040 | 3.5344 | 3.1756 |
| H-6 $\rightarrow$ L+1  | 1.83 | 102.44 | 9.43  | 0.2920 | 2.9924 | 3.5242 | 3.1644 |

|                        |      |        |       |        |        |        |        |
|------------------------|------|--------|-------|--------|--------|--------|--------|
| H-6 $\rightarrow$ L+2  | 4.10 | 57.78  | 27.17 | 0.0385 | 2.9928 | 3.5218 | 3.1634 |
| H-6 $\rightarrow$ L+3  | 1.97 | 93.83  | 7.34  | 0.0421 | 2.9949 | 3.5268 | 3.1684 |
| H-6 $\rightarrow$ L+4  | 1.89 | 88.08  | 7.24  | 0.0508 | 2.9924 | 3.5243 | 3.1668 |
| H-6 $\rightarrow$ L+5  | 2.11 | 89.16  | 6.92  | 0.3598 | 2.9903 | 3.5201 | 3.1628 |
| H-6 $\rightarrow$ L+6  | 3.81 | 67.98  | 23.06 | 0.0627 | 2.9965 | 3.5236 | 3.1667 |
| H-6 $\rightarrow$ L+7  | 2.08 | 81.81  | 4.62  | 0.2785 | 2.9727 | 3.5088 | 3.1493 |
| H-6 $\rightarrow$ L+8  | 2.10 | 71.54  | 8.50  | 0.2354 | 2.9862 | 3.5184 | 3.1602 |
| H-6 $\rightarrow$ L+9  | 1.86 | 55.44  | 2.28  | 0.0762 | 2.9784 | 3.513  | 3.1547 |
| H-6 $\rightarrow$ L+10 | 4.28 | 104.22 | 22.57 | 0.0405 | 2.9905 | 3.5205 | 3.1637 |
| H-6 $\rightarrow$ L+11 | 3.44 | 82.59  | 24.39 | 0.1680 | 2.9901 | 3.5203 | 3.1641 |
| <hr/>                  |      |        |       |        |        |        |        |
| H-7 $\rightarrow$ L    | 2.14 | 44.58  | 9.71  | 0.0595 | 2.9665 | 3.4936 | 3.1344 |
| H-7 $\rightarrow$ L+1  | 1.70 | 51.35  | 2.23  | 0.0655 | 2.9732 | 3.5021 | 3.1424 |
| H-7 $\rightarrow$ L+2  | 3.30 | 29.85  | 15.66 | 0.1686 | 2.9657 | 3.494  | 3.1348 |
| H-7 $\rightarrow$ L+3  | 1.63 | 43.42  | 2.85  | 0.0354 | 2.9654 | 3.4935 | 3.135  |
| H-7 $\rightarrow$ L+4  | 1.68 | 42.79  | 3.03  | 0.0286 | 2.9660 | 3.4931 | 3.1359 |
| H-7 $\rightarrow$ L+5  | 2.27 | 60.15  | 13.48 | 0.0087 | 2.9696 | 3.4974 | 3.1397 |
| H-7 $\rightarrow$ L+6  | 3.57 | 39.48  | 20.18 | 0.0677 | 2.9657 | 3.4921 | 3.1345 |
| H-7 $\rightarrow$ L+7  | 3.02 | 49.02  | 17.78 | 0.3264 | 2.9640 | 3.4928 | 3.1337 |
| H-7 $\rightarrow$ L+8  | 1.96 | 61.52  | 4.32  | 0.0711 | 2.9666 | 3.4951 | 3.1375 |
| H-7 $\rightarrow$ L+9  | 2.86 | 45.06  | 17.23 | 0.0732 | 2.9633 | 3.4917 | 3.1346 |
| H-7 $\rightarrow$ L+10 | 2.00 | 56.23  | 3.04  | 0.1686 | 2.9620 | 3.4896 | 3.1331 |
| H-7 $\rightarrow$ L+11 | 3.06 | 47.14  | 14.93 | 0.0354 | 2.9641 | 3.4924 | 3.136  |
| <hr/>                  |      |        |       |        |        |        |        |
| H-8 $\rightarrow$ L    | 2.56 | 85.22  | 13.79 | 0.0286 | 2.9950 | 3.5238 | 3.1654 |
| H-8 $\rightarrow$ L+1  | 2.00 | 81.76  | 7.18  | 0.0087 | 2.9925 | 3.5225 | 3.1633 |
| H-8 $\rightarrow$ L+2  | 1.79 | 87.26  | 3.34  | 0.3709 | 2.9968 | 3.5275 | 3.1688 |
| H-8 $\rightarrow$ L+3  | 1.78 | 85.64  | 4.09  | 0.2463 | 2.9825 | 3.5124 | 3.1546 |

|                        |      |        |       |        |        |        |        |
|------------------------|------|--------|-------|--------|--------|--------|--------|
| H-8 $\rightarrow$ L+4  | 1.79 | 83.62  | 4.32  | 0.2320 | 2.9823 | 3.5119 | 3.1549 |
| H-8 $\rightarrow$ L+5  | 1.87 | 95.21  | 5.84  | 0.4239 | 2.9806 | 3.51   | 3.1528 |
| H-8 $\rightarrow$ L+6  | 2.03 | 133.11 | 3.67  | 0.2212 | 2.9885 | 3.5197 | 3.1616 |
| H-8 $\rightarrow$ L+7  | 2.00 | 79.14  | 5.39  | 0.0056 | 2.9662 | 3.4973 | 3.1382 |
| H-8 $\rightarrow$ L+8  | 2.06 | 75.86  | 4.38  | 0.1942 | 2.9861 | 3.5166 | 3.1592 |
| H-8 $\rightarrow$ L+9  | 1.91 | 59.75  | 5.83  | 0.0362 | 2.9702 | 3.5005 | 3.1434 |
| H-8 $\rightarrow$ L+10 | 3.14 | 93.98  | 8.05  | 0.1631 | 2.9863 | 3.5154 | 3.1591 |
| H-8 $\rightarrow$ L+11 | 3.12 | 78.98  | 18.58 | 0.0412 | 2.9818 | 3.5106 | 3.1551 |
| <hr/>                  |      |        |       |        |        |        |        |
| H-9 $\rightarrow$ L    | 2.25 | 46.36  | 8.80  | 0.1170 | 2.9858 | 3.514  | 3.1556 |
| H-9 $\rightarrow$ L+1  | 1.84 | 79.11  | 4.84  | 0.2136 | 2.9909 | 3.5216 | 3.162  |
| H-9 $\rightarrow$ L+2  | 2.28 | 57.41  | 8.73  | 0.1702 | 2.9895 | 3.5197 | 3.1611 |
| H-9 $\rightarrow$ L+3  | 1.72 | 55.29  | 3.44  | 0.1223 | 2.9850 | 3.5154 | 3.1573 |
| H-9 $\rightarrow$ L+4  | 1.75 | 53.11  | 5.51  | 0.0883 | 2.9849 | 3.5154 | 3.1581 |
| H-9 $\rightarrow$ L+5  | 1.82 | 76.32  | 0.65  | 0.0648 | 2.9813 | 3.5123 | 3.1549 |
| H-9 $\rightarrow$ L+6  | 2.04 | 86.04  | 6.49  | 0.0131 | 2.9906 | 3.5225 | 3.1642 |
| H-9 $\rightarrow$ L+7  | 3.05 | 35.26  | 13.24 | 0.1123 | 2.9844 | 3.5146 | 3.1558 |
| H-9 $\rightarrow$ L+8  | 2.09 | 51.16  | 3.57  | 0.0915 | 2.9862 | 3.5171 | 3.1594 |
| H-9 $\rightarrow$ L+9  | 1.93 | 117.74 | 4.83  | 0.0833 | 2.9950 | 3.5315 | 3.1712 |
| H-9 $\rightarrow$ L+10 | 3.87 | 60.24  | 20.25 | 0.1027 | 2.9846 | 3.5143 | 3.1574 |
| H-9 $\rightarrow$ L+11 | 2.22 | 69.86  | 1.52  | 0.0973 | 2.9839 | 3.5112 | 3.1559 |
| <hr/>                  |      |        |       |        |        |        |        |
| H-10 $\rightarrow$ L   | 2.99 | 69.47  | 17.98 | 0.3568 | 2.9799 | 3.5073 | 3.1487 |
| H-10 $\rightarrow$ L+1 | 2.02 | 50.60  | 6.74  | 0.0849 | 2.9839 | 3.5135 | 3.1539 |
| H-10 $\rightarrow$ L+2 | 2.04 | 79.85  | 7.47  | 0.0912 | 2.9872 | 3.5166 | 3.1579 |
| H-10 $\rightarrow$ L+3 | 1.80 | 52.22  | 4.41  | 0.0720 | 2.9730 | 3.5015 | 3.1431 |
| H-10 $\rightarrow$ L+4 | 1.86 | 41.70  | 6.86  | 0.1039 | 2.9738 | 3.5019 | 3.1444 |
| H-10 $\rightarrow$ L+5 | 1.81 | 56.34  | 2.58  | 0.0237 | 2.9724 | 3.4996 | 3.143  |

|                         |      |        |       |        |        |        |        |
|-------------------------|------|--------|-------|--------|--------|--------|--------|
| H-10 $\rightarrow$ L+6  | 1.80 | 63.33  | 4.06  | 0.1079 | 2.9699 | 3.4988 | 3.1411 |
| H-10 $\rightarrow$ L+7  | 2.04 | 86.42  | 9.13  | 0.0496 | 2.9700 | 3.5001 | 3.1411 |
| H-10 $\rightarrow$ L+8  | 2.29 | 24.79  | 6.52  | 0.0270 | 2.9723 | 3.5015 | 3.1439 |
| H-10 $\rightarrow$ L+9  | 2.39 | 32.49  | 10.23 | 0.0706 | 2.9712 | 3.5001 | 3.1433 |
| H-10 $\rightarrow$ L+10 | 4.82 | 61.82  | 24.90 | 0.0174 | 2.9730 | 3.5012 | 3.1447 |
| H-10 $\rightarrow$ L+11 | 2.18 | 50.68  | 0.97  | 0.0439 | 2.9738 | 3.5006 | 3.1457 |
| <hr/>                   |      |        |       |        |        |        |        |
| H-11 $\rightarrow$ L    | 2.60 | 85.79  | 15.31 | 0.1013 | 2.9804 | 3.5084 | 3.1498 |
| H-11 $\rightarrow$ L+1  | 1.75 | 61.02  | 1.74  | 0.4739 | 2.9734 | 3.5033 | 3.1434 |
| H-11 $\rightarrow$ L+2  | 1.93 | 73.08  | 10.51 | 0.1660 | 2.9774 | 3.5085 | 3.1483 |
| H-11 $\rightarrow$ L+3  | 1.79 | 84.07  | 3.45  | 0.1900 | 2.9802 | 3.5106 | 3.1524 |
| H-11 $\rightarrow$ L+4  | 1.84 | 78.18  | 2.39  | 0.1504 | 2.9784 | 3.508  | 3.1508 |
| H-11 $\rightarrow$ L+5  | 2.05 | 100.28 | 7.56  | 0.1168 | 2.9779 | 3.5078 | 3.1497 |
| H-11 $\rightarrow$ L+6  | 1.95 | 112.50 | 8.58  | 0.0107 | 2.9769 | 3.5079 | 3.1486 |
| H-11 $\rightarrow$ L+7  | 3.42 | 62.30  | 17.58 | 0.2248 | 2.9751 | 3.5051 | 3.1462 |
| H-11 $\rightarrow$ L+8  | 2.03 | 71.19  | 3.68  | 0.0971 | 2.9744 | 3.5043 | 3.147  |
| H-11 $\rightarrow$ L+9  | 2.23 | 105.28 | 8.38  | 0.0273 | 3.0035 | 3.5371 | 3.1774 |
| H-11 $\rightarrow$ L+10 | 2.20 | 38.25  | 6.60  | 0.0089 | 2.9744 | 3.5029 | 3.1466 |
| H-11 $\rightarrow$ L+11 | 2.51 | 73.93  | 10.24 | 0.0500 | 2.9751 | 3.5048 | 3.1485 |
| <hr/>                   |      |        |       |        |        |        |        |
| Ground state            | -    | 68.47  | 0.62  | -      | 2.9768 | 3.4832 | 3.1137 |
| <hr/>                   |      |        |       |        |        |        |        |

Table S2: Particle-hole state, excitation energy ( $E_{ex}$ , magnetic anisotropy energy (MAE), Dipole moment, Transition dipole moment(TDM), Average spin charge on Cr sites for  $\text{CrBr}_3$  for singly excited states spin conserving particle-hole state.

| Transition            | E (eV) | MAE (K) | Dipole (D) | TDM    | Spin charge (e) |          |        |
|-----------------------|--------|---------|------------|--------|-----------------|----------|--------|
|                       |        |         |            |        | Integrated      | Mulliken | Lowdin |
| H $\rightarrow$ L     | 1.86   | 10.79   | 2.24       | 0.0336 | 2.8848          | 3.3234   | 3.0177 |
| H $\rightarrow$ L+1   | 1.79   | 14.78   | 2.13       | 0.1707 | 2.8841          | 3.3208   | 3.0167 |
| H $\rightarrow$ L+2   | 1.73   | 13.05   | 2.62       | 0.0398 | 2.8835          | 3.3202   | 3.017  |
| H $\rightarrow$ L+3   | 1.99   | 14.04   | 2.21       | 0.1083 | 2.8845          | 3.3213   | 3.0177 |
| H $\rightarrow$ L+4   | 1.75   | 14.64   | 0.84       | 0.0288 | 2.8825          | 3.3209   | 3.0174 |
| H $\rightarrow$ L+5   | 1.79   | 13.44   | 2.54       | 0.0441 | 2.8836          | 3.3214   | 3.0174 |
| H $\rightarrow$ L+6   | 1.80   | 16.68   | 1.98       | 0.0016 | 2.8820          | 3.3211   | 3.017  |
| H $\rightarrow$ L+7   | 2.09   | 18.18   | 5.16       | 0.0037 | 2.8798          | 3.3176   | 3.0142 |
| H $\rightarrow$ L+8   | 2.44   | 12.51   | 6.54       | 0.1683 | 2.8821          | 3.3194   | 3.0169 |
| H $\rightarrow$ L+9   | 2.20   | 12.94   | 6.16       | 0.1723 | 2.8763          | 3.3128   | 3.0107 |
| H $\rightarrow$ L+10  | 1.98   | 11.90   | 5.90       | 0.1642 | 2.8767          | 3.3137   | 3.012  |
| H $\rightarrow$ L+11  | 2.10   | 21.93   | 1.82       | 0.0973 | 2.8744          | 3.3118   | 3.0092 |
| H-1 $\rightarrow$ L   | 1.62   | 8.89    | 0.81       | 0.0185 | 2.8847          | 3.3228   | 3.0172 |
| H-1 $\rightarrow$ L+1 | 1.84   | 14.61   | 4.67       | 0.1393 | 2.8853          | 3.3222   | 3.0186 |
| H-1 $\rightarrow$ L+2 | 1.97   | 13.88   | 4.87       | 0.0129 | 2.8851          | 3.3221   | 3.0188 |
| H-1 $\rightarrow$ L+3 | 1.71   | 16.36   | 1.25       | 0.0789 | 2.8836          | 3.32     | 3.0164 |
| H-1 $\rightarrow$ L+4 | 1.77   | 14.73   | 2.20       | 0.0663 | 2.8824          | 3.3205   | 3.0172 |
| H-1 $\rightarrow$ L+5 | 1.98   | 15.09   | 5.17       | 0.0314 | 2.8831          | 3.3209   | 3.017  |
| H-1 $\rightarrow$ L+6 | 1.84   | 15.87   | 2.04       | 0.0804 | 2.8808          | 3.3188   | 3.0158 |
| H-1 $\rightarrow$ L+7 | 2.12   | 14.30   | 0.44       | 0.1132 | 2.8814          | 3.3195   | 3.016  |
| H-1 $\rightarrow$ L+8 | 1.76   | 12.03   | 1.22       | 0.0859 | 2.8791          | 3.3154   | 3.0139 |
| H-1 $\rightarrow$ L+9 | 2.07   | 13.63   | 1.81       | 0.2554 | 2.8787          | 3.3147   | 3.0121 |



|                        |      |       |       |        |        |        |        |
|------------------------|------|-------|-------|--------|--------|--------|--------|
| H-1 $\rightarrow$ L+10 | 2.99 | 10.07 | 7.43  | 0.1000 | 2.8777 | 3.3143 | 3.0129 |
| H-1 $\rightarrow$ L+11 | 5.48 | 25.11 | 15.80 | 0.0604 | 2.8816 | 3.3194 | 3.0168 |
| H-2 $\rightarrow$ L    | 1.86 | 10.01 | 1.00  | 0.0135 | 2.8700 | 3.3055 | 3.002  |
| H-2 $\rightarrow$ L+1  | 1.76 | 11.41 | 0.93  | 0.0602 | 2.8715 | 3.3048 | 3.0032 |
| H-2 $\rightarrow$ L+2  | 1.81 | 11.67 | 0.63  | 0.0495 | 2.8702 | 3.3039 | 3.003  |
| H-2 $\rightarrow$ L+3  | 1.89 | 11.16 | 1.36  | 0.0356 | 2.8695 | 3.303  | 3.0016 |
| H-2 $\rightarrow$ L+4  | 1.93 | 11.17 | 1.88  | 0.1521 | 2.8681 | 3.3032 | 3.0019 |
| H-2 $\rightarrow$ L+5  | 1.89 | 11.46 | 2.09  | 0.0681 | 2.8689 | 3.3036 | 3.0021 |
| H-2 $\rightarrow$ L+6  | 1.87 | 12.42 | 0.18  | 0.0307 | 2.8667 | 3.302  | 3.0007 |
| H-2 $\rightarrow$ L+7  | 1.95 | 12.40 | 2.00  | 0.0571 | 2.8659 | 3.3012 | 2.9999 |
| H-2 $\rightarrow$ L+8  | 2.09 | 9.03  | 1.96  | 0.0268 | 2.8644 | 3.2982 | 2.9988 |
| H-2 $\rightarrow$ L+9  | 2.04 | 12.39 | 2.82  | 0.0349 | 2.8631 | 3.2972 | 2.997  |
| H-2 $\rightarrow$ L+10 | 2.08 | 11.00 | 1.29  | 0.0074 | 2.8633 | 3.2972 | 2.9978 |
| H-2 $\rightarrow$ L+11 | 1.91 | 19.97 | 2.31  | 0.0473 | 2.8706 | 3.3038 | 3.0036 |
| H-3 $\rightarrow$ L    | 2.27 | 15.49 | 5.79  | 0.0902 | 2.8756 | 3.31   | 3.0075 |
| H-3 $\rightarrow$ L+1  | 2.73 | 12.93 | 12.73 | 0.0454 | 2.8716 | 3.3074 | 3.0051 |
| H-3 $\rightarrow$ L+2  | 2.30 | 13.80 | 8.62  | 0.0218 | 2.8712 | 3.3062 | 3.005  |
| H-3 $\rightarrow$ L+3  | 2.04 | 15.77 | 3.39  | 0.0345 | 2.8740 | 3.3067 | 3.0062 |
| H-3 $\rightarrow$ L+4  | 2.16 | 15.58 | 1.43  | 0.0289 | 2.8732 | 3.3075 | 3.0068 |
| H-3 $\rightarrow$ L+5  | 2.72 | 16.29 | 11.27 | 0.0804 | 2.8739 | 3.3082 | 3.0068 |
| H-3 $\rightarrow$ L+6  | 1.93 | 17.78 | 1.05  | 0.1244 | 2.8717 | 3.3061 | 3.0053 |
| H-3 $\rightarrow$ L+7  | 2.15 | 15.61 | 2.00  | 0.1160 | 2.8694 | 3.3032 | 3.0031 |
| H-3 $\rightarrow$ L+8  | 2.41 | 16.37 | 2.04  | 0.0098 | 2.8712 | 3.304  | 3.0049 |
| H-3 $\rightarrow$ L+9  | 2.02 | 15.20 | 1.83  | 0.0572 | 2.8661 | 3.2991 | 2.9999 |
| H-3 $\rightarrow$ L+10 | 2.29 | 13.57 | 4.11  | 0.0386 | 2.8678 | 3.3008 | 3.0022 |
| H-3 $\rightarrow$ L+11 | 5.52 | 18.74 | 23.49 | 0.0471 | 2.8666 | 3.301  | 3.0015 |

|            |      |       |       |        |        |        |        |
|------------|------|-------|-------|--------|--------|--------|--------|
| H-4 → L    | 2.49 | 15.65 | 3.52  | 0.1091 | 2.6434 | 3.0537 | 2.7495 |
| H-4 → L+1  | 2.48 | 9.04  | 4.29  | 0.0155 | 2.6437 | 3.0544 | 2.7504 |
| H-4 → L+2  | 2.39 | 15.72 | 1.83  | 0.0481 | 2.6401 | 3.0523 | 2.7462 |
| H-4 → L+3  | 2.43 | 13.69 | 0.80  | 0.0248 | 2.6409 | 3.0537 | 2.7476 |
| H-4 → L+4  | 2.41 | 14.67 | 0.77  | 0.0122 | 2.6295 | 3.0393 | 2.7329 |
| H-4 → L+5  | 2.45 | 12.68 | 0.79  | 0.0446 | 2.6426 | 3.055  | 2.7517 |
| H-4 → L+6  | 2.40 | 16.05 | 0.21  | 0.0978 | 2.6324 | 3.0452 | 2.7403 |
| H-4 → L+7  | 3.57 | 15.05 | 0.86  | 0.0520 | 2.6397 | 3.0525 | 2.7459 |
| H-4 → L+8  | 2.63 | 22.51 | 3.70  | 0.0046 | 2.6287 | 3.0437 | 2.7384 |
| H-4 → L+9  | 2.52 | 19.51 | 0.80  | 0.0236 | 2.6390 | 3.053  | 2.751  |
| H-4 → L+10 | 2.72 | 9.74  | 1.33  | 0.0422 | 2.6172 | 3.0322 | 2.7283 |
| H-4 → L+11 | 2.82 | 19.42 | 2.99  | 0.0168 | 2.6324 | 3.0507 | 2.7453 |
| <hr/>      |      |       |       |        |        |        |        |
| H-5 → L    | 1.90 | 15.16 | 2.62  | 0.1571 | 2.8734 | 3.308  | 3.0048 |
| H-5 → L+1  | 2.02 | 14.32 | 6.07  | 0.0378 | 2.8737 | 3.3068 | 3.0054 |
| H-5 → L+2  | 2.17 | 15.22 | 6.53  | 0.0240 | 2.8733 | 3.3069 | 3.0058 |
| H-5 → L+3  | 2.12 | 15.25 | 5.87  | 0.0059 | 2.8728 | 3.3054 | 3.0042 |
| H-5 → L+4  | 1.91 | 15.44 | 1.91  | 0.0258 | 2.8711 | 3.3055 | 3.0046 |
| H-5 → L+5  | 2.08 | 16.41 | 4.69  | 0.0581 | 2.8722 | 3.3062 | 3.0047 |
| H-5 → L+6  | 2.00 | 16.07 | 3.19  | 0.0939 | 2.8689 | 3.3032 | 3.0027 |
| H-5 → L+7  | 2.36 | 16.63 | 3.40  | 0.0803 | 2.8696 | 3.3039 | 3.0029 |
| H-5 → L+8  | 2.06 | 13.97 | 0.40  | 0.0021 | 2.8676 | 3.3004 | 3.0014 |
| H-5 → L+9  | 2.43 | 15.63 | 2.67  | 0.0149 | 2.8674 | 3.3    | 3.0002 |
| H-5 → L+10 | 4.02 | 14.32 | 10.81 | 0.0610 | 2.8698 | 3.3034 | 3.0028 |
| H-5 → L+11 | 6.00 | 26.21 | 16.71 | 0.1083 | 2.8702 | 3.3044 | 3.0041 |
| <hr/>      |      |       |       |        |        |        |        |
| H-6 → L    | 1.98 | 15.18 | 2.95  | 0.0711 | 2.8668 | 3.3011 | 2.9987 |
| H-6 → L+1  | 1.91 | 16.00 | 0.41  | 0.1598 | 2.8680 | 3.3005 | 2.9998 |

|                        |      |       |       |        |        |        |        |
|------------------------|------|-------|-------|--------|--------|--------|--------|
| H-6 $\rightarrow$ L+2  | 1.94 | 15.91 | 2.37  | 0.0541 | 2.8667 | 3.2993 | 2.9995 |
| H-6 $\rightarrow$ L+3  | 2.08 | 16.39 | 3.93  | 0.1600 | 2.8678 | 3.3002 | 2.9999 |
| H-6 $\rightarrow$ L+4  | 1.96 | 15.52 | 3.53  | 0.0310 | 2.8653 | 3.2995 | 2.9993 |
| H-6 $\rightarrow$ L+5  | 1.99 | 15.98 | 2.04  | 0.0452 | 2.8660 | 3.3002 | 2.9989 |
| H-6 $\rightarrow$ L+6  | 1.93 | 17.20 | 1.18  | 0.0377 | 2.8645 | 3.299  | 2.9982 |
| H-6 $\rightarrow$ L+7  | 2.18 | 16.03 | 2.32  | 0.0070 | 2.8637 | 3.2981 | 2.9977 |
| H-6 $\rightarrow$ L+8  | 2.63 | 14.40 | 6.91  | 0.0633 | 2.8627 | 3.2954 | 2.9968 |
| H-6 $\rightarrow$ L+9  | 2.25 | 15.41 | 2.90  | 0.0349 | 2.8604 | 3.2934 | 2.9942 |
| H-6 $\rightarrow$ L+10 | 2.17 | 11.95 | 5.85  | 0.0163 | 2.8628 | 3.2962 | 2.9975 |
| H-6 $\rightarrow$ L+11 | 2.12 | 19.81 | 4.06  | 0.0116 | 2.8646 | 3.3006 | 2.9996 |
| <hr/>                  |      |       |       |        |        |        |        |
| H-7 $\rightarrow$ L    | 1.89 | 15.36 | 0.59  | 0.0284 | 2.8661 | 3.3004 | 2.998  |
| H-7 $\rightarrow$ L+1  | 1.96 | 15.76 | 4.31  | 0.1974 | 2.8655 | 3.2977 | 2.997  |
| H-7 $\rightarrow$ L+2  | 2.01 | 16.84 | 3.85  | 0.0057 | 2.8651 | 3.298  | 2.9978 |
| H-7 $\rightarrow$ L+3  | 1.91 | 15.77 | 2.06  | 0.0742 | 2.8653 | 3.2978 | 2.9974 |
| H-7 $\rightarrow$ L+4  | 1.97 | 16.11 | 1.62  | 0.0585 | 2.8642 | 3.2979 | 2.9979 |
| H-7 $\rightarrow$ L+5  | 2.05 | 16.27 | 4.73  | 0.0390 | 2.8658 | 3.2994 | 2.999  |
| H-7 $\rightarrow$ L+6  | 1.99 | 15.95 | 1.28  | 0.0220 | 2.8616 | 3.2956 | 2.9957 |
| H-7 $\rightarrow$ L+7  | 2.17 | 16.18 | 1.78  | 0.0350 | 2.8611 | 3.295  | 2.9949 |
| H-7 $\rightarrow$ L+8  | 2.01 | 14.15 | 1.75  | 0.0055 | 2.8641 | 3.2964 | 2.9977 |
| H-7 $\rightarrow$ L+9  | 2.23 | 15.41 | 1.35  | 0.0407 | 2.8618 | 3.295  | 2.9956 |
| H-7 $\rightarrow$ L+10 | 2.99 | 12.91 | 7.91  | 0.0351 | 2.8593 | 3.2924 | 2.9942 |
| H-7 $\rightarrow$ L+11 | 5.74 | 24.30 | 16.20 | 0.0748 | 2.8621 | 3.2958 | 2.9965 |
| <hr/>                  |      |       |       |        |        |        |        |
| H-8 $\rightarrow$ L    | 2.20 | 10.23 | 0.28  | 0.0125 | 2.8946 | 3.3303 | 3.0286 |
| H-8 $\rightarrow$ L+1  | 2.41 | 9.85  | 6.21  | 0.0086 | 2.8866 | 3.3188 | 3.0189 |
| H-8 $\rightarrow$ L+2  | 2.05 | 0.00  | 3.06  | 0.0035 | 2.8839 | 3.3193 | 3.0196 |
| H-8 $\rightarrow$ L+3  | 2.34 | 11.46 | 1.47  | 0.0273 | 2.8949 | 3.3293 | 3.0293 |

|                        |      |       |       |        |        |        |        |
|------------------------|------|-------|-------|--------|--------|--------|--------|
| H-8 $\rightarrow$ L+4  | 2.11 | 12.40 | 2.60  | 0.0081 | 2.8910 | 3.3274 | 3.0275 |
| H-8 $\rightarrow$ L+5  | 2.21 | 11.24 | 3.25  | 0.0091 | 2.8880 | 3.3255 | 3.0234 |
| H-8 $\rightarrow$ L+6  | 2.14 | 13.53 | 3.39  | 0.0171 | 2.8831 | 3.3191 | 3.0196 |
| H-8 $\rightarrow$ L+7  | 2.13 | 10.32 | 1.89  | 0.0149 | 2.8845 | 3.3185 | 3.0194 |
| H-8 $\rightarrow$ L+8  | 2.64 | 10.88 | 1.67  | 0.0014 | 2.8838 | 3.3169 | 3.0196 |
| H-8 $\rightarrow$ L+9  | 2.20 | 9.02  | 1.06  | 0.0015 | 2.8829 | 3.316  | 3.0179 |
| H-8 $\rightarrow$ L+10 | 2.40 | 9.20  | 5.49  | 0.0017 | 2.8844 | 3.3178 | 3.0205 |
| H-8 $\rightarrow$ L+11 | 5.87 | 17.58 | 22.05 | 0.0008 | 2.8783 | 3.313  | 3.0143 |
| <hr/>                  |      |       |       |        |        |        |        |
| H-9 $\rightarrow$ L    | 2.05 | 9.67  | 0.83  | 0.0127 | 2.8925 | 3.328  | 3.0264 |
| H-9 $\rightarrow$ L+1  | 2.52 | 15.11 | 10.59 | 0.0037 | 2.8927 | 3.3279 | 3.0278 |
| H-9 $\rightarrow$ L+2  | 2.33 | 13.67 | 6.08  | 0.0022 | 2.8945 | 3.3289 | 3.0297 |
| H-9 $\rightarrow$ L+3  | 2.17 | 10.25 | 3.13  | 0.0390 | 2.8877 | 3.3217 | 3.0221 |
| H-9 $\rightarrow$ L+4  | 2.10 | 11.65 | 3.00  | 0.0034 | 2.8911 | 3.327  | 3.0277 |
| H-9 $\rightarrow$ L+5  | 2.59 | 10.31 | 8.73  | 0.0195 | 2.8912 | 3.3264 | 3.0262 |
| H-9 $\rightarrow$ L+6  | 2.10 | 12.05 | 1.09  | 0.0072 | 2.8911 | 3.3265 | 3.0273 |
| H-9 $\rightarrow$ L+7  | 2.21 | 11.69 | 2.53  | 0.0081 | 2.8908 | 3.3252 | 3.0259 |
| H-9 $\rightarrow$ L+8  | 2.42 | 10.22 | 2.16  | 0.0006 | 2.8893 | 3.3226 | 3.0252 |
| H-9 $\rightarrow$ L+9  | 2.23 | 14.53 | 2.07  | 0.0002 | 2.8860 | 3.3191 | 3.0208 |
| H-9 $\rightarrow$ L+10 | 2.67 | 7.13  | 6.23  | 0.0013 | 2.8858 | 3.3191 | 3.0218 |
| H-9 $\rightarrow$ L+11 | 5.47 | 24.63 | 18.63 | 0.0028 | 2.8918 | 3.3269 | 3.0282 |
| <hr/>                  |      |       |       |        |        |        |        |
| H-10 $\rightarrow$ L   | 2.01 | 13.55 | 3.90  | 0.0108 | 2.8640 | 3.3031 | 2.9963 |
| H-10 $\rightarrow$ L+1 | 2.32 | 14.49 | 3.91  | 0.0012 | 2.8645 | 3.3013 | 2.997  |
| H-10 $\rightarrow$ L+2 | 2.39 | 14.84 | 9.28  | 0.0213 | 2.8628 | 3.3012 | 2.996  |
| H-10 $\rightarrow$ L+3 | 2.31 | 14.22 | 7.80  | 0.0175 | 2.8640 | 3.3013 | 2.9966 |
| H-10 $\rightarrow$ L+4 | 1.99 | 14.36 | 1.44  | 0.0117 | 2.8621 | 3.3014 | 2.9965 |
| H-10 $\rightarrow$ L+5 | 2.61 | 14.96 | 9.34  | 0.0071 | 2.8629 | 3.3017 | 2.9966 |

|                         |      |       |       |        |        |        |        |
|-------------------------|------|-------|-------|--------|--------|--------|--------|
| H-10 $\rightarrow$ L+6  | 2.11 | 14.99 | 4.32  | 0.0151 | 2.8598 | 3.2994 | 2.9944 |
| H-10 $\rightarrow$ L+7  | 2.07 | 14.97 | 1.83  | 0.0096 | 2.8594 | 3.2992 | 2.9941 |
| H-10 $\rightarrow$ L+8  | 2.25 | 11.78 | 0.87  | 0.0004 | 2.8567 | 3.2954 | 2.992  |
| H-10 $\rightarrow$ L+9  | 2.19 | 12.65 | 1.70  | 0.0011 | 2.8570 | 3.2955 | 2.9916 |
| H-10 $\rightarrow$ L+10 | 2.43 | 10.14 | 4.59  | 0.0010 | 2.8560 | 3.2945 | 2.9918 |
| H-10 $\rightarrow$ L+11 | 6.62 | 24.10 | 24.29 | 0.0028 | 2.8598 | 3.2976 | 2.9946 |
| <hr/>                   |      |       |       |        |        |        |        |
| H-11 $\rightarrow$ L    | 2.14 | 13.96 | 5.04  | 0.1238 | 2.8790 | 3.3131 | 3.0127 |
| H-11 $\rightarrow$ L+1  | 4.51 | 13.83 | 23.07 | 0.0062 | 2.8830 | 3.3149 | 3.0158 |
| H-11 $\rightarrow$ L+2  | 4.92 | 14.03 | 23.68 | 0.0600 | 2.8829 | 3.3152 | 3.0168 |
| H-11 $\rightarrow$ L+3  | 2.23 | 14.44 | 7.87  | 0.0509 | 2.8755 | 3.3094 | 3.0097 |
| H-11 $\rightarrow$ L+4  | 2.73 | 14.55 | 11.72 | 0.0565 | 2.8722 | 3.3047 | 3.0061 |
| H-11 $\rightarrow$ L+5  | 2.10 | 13.56 | 5.72  | 0.0792 | 2.8775 | 3.3118 | 3.0131 |
| H-11 $\rightarrow$ L+6  | 4.02 | 14.46 | 16.38 | 0.0510 | 2.8790 | 3.3132 | 3.0143 |
| H-11 $\rightarrow$ L+7  | 4.39 | 13.31 | 13.49 | 0.0227 | 2.8790 | 3.3131 | 3.0135 |
| H-11 $\rightarrow$ L+8  | 2.19 | 15.49 | 4.76  | 0.0151 | 2.8728 | 3.3074 | 3.007  |
| H-11 $\rightarrow$ L+9  | 5.54 | 12.54 | 25.82 | 0.0122 | 2.8765 | 3.3101 | 3.0118 |
| H-11 $\rightarrow$ L+10 | 4.91 | 11.77 | 13.29 | 0.0298 | 2.8774 | 3.3102 | 3.0124 |
| H-11 $\rightarrow$ L+11 | 6.51 | 21.79 | 15.72 | 0.0105 | 2.8759 | 3.3097 | 3.0117 |
| <hr/>                   |      |       |       |        |        |        |        |
| Ground state            | -    | 14.51 | 0.15  | -      | 2.8582 | 3.3037 | 2.9957 |
| <hr/>                   |      |       |       |        |        |        |        |

Table S3: Particle-hole state, excitation energy ( $E_{ex}$ , magnetic anisotropy energy (MAE), Dipole moment, Transition dipole moment (TDM), Average spin charge on Cr sites for  $\text{CrCl}_3$  for singly excited states spin conserving particle-hole state.

| Transition            | E (eV) | MAE (K) | Dipole (D) | TDM    | Spin charge (e) |          |        |
|-----------------------|--------|---------|------------|--------|-----------------|----------|--------|
|                       |        |         |            |        | Integrated      | Mulliken | Lowdin |
| H $\rightarrow$ L     | 1.91   | 6.05    | 2.30       | 0.0093 | 2.8270          | 3.2172   | 2.9395 |
| H $\rightarrow$ L+1   | 2.15   | 7.56    | 3.76       | 0.0959 | 2.8270          | 3.2152   | 2.9394 |
| H $\rightarrow$ L+2   | 2.01   | 6.77    | 2.15       | 0.0757 | 2.8262          | 3.2148   | 2.9395 |
| H $\rightarrow$ L+3   | 2.27   | 8.60    | 1.49       | 0.0341 | 2.8253          | 3.2143   | 2.9389 |
| H $\rightarrow$ L+4   | 2.01   | 5.34    | 2.64       | 0.0234 | 2.8253          | 3.2147   | 2.9387 |
| H $\rightarrow$ L+5   | 2.34   | 3.65    | 2.14       | 0.0114 | 2.8245          | 3.2145   | 2.9391 |
| H $\rightarrow$ L+6   | 2.69   | 5.92    | 1.78       | 0.0147 | 2.8245          | 3.2133   | 2.9384 |
| H $\rightarrow$ L+7   | 2.28   | 3.78    | 2.20       | 0.0223 | 2.8248          | 3.2139   | 2.9389 |
| H $\rightarrow$ L+8   | 2.37   | 6.21    | 1.48       | 0.0841 | 2.8219          | 3.2105   | 2.9362 |
| H $\rightarrow$ L+9   | 4.51   | 10.24   | 11.80      | 0.0252 | 2.8245          | 3.2131   | 2.9385 |
| H $\rightarrow$ L+10  | 2.49   | 9.59    | 5.38       | 0.0530 | 2.8213          | 3.2095   | 2.9360 |
| H $\rightarrow$ L+11  | 2.19   | 9.46    | 2.39       | 0.0068 | 2.8197          | 3.2075   | 2.9353 |
| H-1 $\rightarrow$ L   | 1.88   | 3.19    | 3.20       | 0.0296 | 2.8264          | 3.2164   | 2.9389 |
| H-1 $\rightarrow$ L+1 | 2.08   | 6.94    | 1.27       | 0.0411 | 2.8266          | 3.2149   | 2.9385 |
| H-1 $\rightarrow$ L+2 | 2.09   | 8.45    | 3.27       | 0.0421 | 2.8261          | 3.2147   | 2.9386 |
| H-1 $\rightarrow$ L+3 | 2.14   | 9.35    | 2.98       | 0.0064 | 2.8253          | 3.2143   | 2.9381 |
| H-1 $\rightarrow$ L+4 | 2.26   | 2.69    | 4.13       | 0.0090 | 2.8253          | 3.2149   | 2.9391 |
| H-1 $\rightarrow$ L+5 | 2.42   | 4.10    | 5.05       | 0.0047 | 2.8239          | 3.2135   | 2.9383 |
| H-1 $\rightarrow$ L+6 | 2.27   | 6.33    | 3.92       | 0.0693 | 2.8231          | 3.2118   | 2.9371 |
| H-1 $\rightarrow$ L+7 | 2.48   | 4.58    | 4.28       | 0.0625 | 2.8236          | 3.2124   | 2.9378 |
| H-1 $\rightarrow$ L+8 | 2.44   | 7.10    | 5.76       | 0.0772 | 2.8211          | 3.2102   | 2.9337 |
| H-1 $\rightarrow$ L+9 | 2.40   | 9.00    | 8.37       | 0.0917 | 2.8217          | 3.2099   | 2.936  |

|                        |      |       |       |        |        |        |        |
|------------------------|------|-------|-------|--------|--------|--------|--------|
| H-1 $\rightarrow$ L+10 | 2.54 | 7.69  | 5.89  | 0.0107 | 2.8198 | 3.2086 | 2.9342 |
| H-1 $\rightarrow$ L+11 | 3.36 | 10.85 | 6.32  | 0.0125 | 2.8209 | 3.2092 | 2.9362 |
| H-2 $\rightarrow$ L    | 1.96 | 5.20  | 1.47  | 0.0442 | 2.8209 | 3.2093 | 2.9329 |
| H-2 $\rightarrow$ L+1  | 1.97 | 7.28  | 1.91  | 0.0756 | 2.8210 | 3.2074 | 2.9326 |
| H-2 $\rightarrow$ L+2  | 2.01 | 8.41  | 2.10  | 0.0672 | 2.8209 | 3.2076 | 2.9333 |
| H-2 $\rightarrow$ L+3  | 2.14 | 9.12  | 2.37  | 0.0499 | 2.8198 | 3.2072 | 2.9326 |
| H-2 $\rightarrow$ L+4  | 2.02 | 4.42  | 2.56  | 0.0543 | 2.8194 | 3.2071 | 2.9326 |
| H-2 $\rightarrow$ L+5  | 2.03 | 3.58  | 2.01  | 0.0093 | 2.8178 | 3.2058 | 2.9318 |
| H-2 $\rightarrow$ L+6  | 2.25 | 5.54  | 2.17  | 0.0604 | 2.8174 | 3.2045 | 2.9310 |
| H-2 $\rightarrow$ L+7  | 2.03 | 3.83  | 0.98  | 0.0142 | 2.8181 | 3.2053 | 2.9318 |
| H-2 $\rightarrow$ L+8  | 2.41 | 6.70  | 5.04  | 0.0040 | 2.8153 | 3.2020 | 2.9292 |
| H-2 $\rightarrow$ L+9  | 2.65 | 7.39  | 2.68  | 0.0306 | 2.8160 | 3.2023 | 2.9300 |
| H-2 $\rightarrow$ L+10 | 2.19 | 8.09  | 2.82  | 0.0100 | 2.8134 | 3.1997 | 2.9275 |
| H-2 $\rightarrow$ L+11 | 2.18 | 9.38  | 0.95  | 0.0409 | 2.8137 | 3.1998 | 2.9288 |
| H-3 $\rightarrow$ L    | 2.36 | 5.71  | 7.13  | 0.0427 | 2.8165 | 3.2064 | 2.9270 |
| H-3 $\rightarrow$ L+1  | 3.08 | 7.27  | 12.01 | 0.0124 | 2.8186 | 3.2064 | 2.9291 |
| H-3 $\rightarrow$ L+2  | 3.16 | 5.24  | 8.37  | 0.0171 | 2.8234 | 3.2117 | 2.9366 |
| H-3 $\rightarrow$ L+3  | 2.79 | 8.76  | 8.47  | 0.0200 | 2.8157 | 3.2046 | 2.9268 |
| H-3 $\rightarrow$ L+4  | 2.95 | 3.67  | 11.60 | 0.0191 | 2.8170 | 3.2060 | 2.9290 |
| H-3 $\rightarrow$ L+5  | 2.27 | 3.18  | 6.32  | 0.0181 | 2.8150 | 3.2039 | 2.9277 |
| H-3 $\rightarrow$ L+6  | 2.07 | 6.48  | 3.49  | 0.0135 | 2.8151 | 3.2032 | 2.9274 |
| H-3 $\rightarrow$ L+7  | 2.20 | 4.19  | 4.81  | 0.0102 | 2.8135 | 3.2022 | 2.9257 |
| H-3 $\rightarrow$ L+8  | 2.31 | 7.16  | 2.53  | 0.0005 | 2.8100 | 3.1983 | 2.9226 |
| H-3 $\rightarrow$ L+9  | 4.88 | 10.89 | 19.05 | 0.0038 | 2.8143 | 3.2026 | 2.9265 |
| H-3 $\rightarrow$ L+10 | 2.39 | 8.36  | 0.56  | 0.0017 | 2.8093 | 3.1972 | 2.9225 |
| H-3 $\rightarrow$ L+11 | 2.24 | 8.41  | 1.79  | 0.0131 | 2.8085 | 3.1962 | 2.9226 |

|            |      |       |       |        |        |        |        |
|------------|------|-------|-------|--------|--------|--------|--------|
| H-4 → L    | 2.53 | 5.90  | 6.29  | 0.0010 | 2.8143 | 3.2019 | 2.9260 |
| H-4 → L+1  | 2.76 | 6.13  | 11.43 | 0.0164 | 2.8168 | 3.2024 | 2.9280 |
| H-4 → L+2  | 2.36 | 6.99  | 7.76  | 0.0411 | 2.8208 | 3.2078 | 2.9327 |
| H-4 → L+3  | 2.35 | 8.32  | 5.58  | 0.0327 | 2.8180 | 3.2047 | 2.9311 |
| H-4 → L+4  | 2.24 | 2.18  | 4.13  | 0.0449 | 2.8133 | 3.2003 | 2.9260 |
| H-4 → L+5  | 2.12 | 3.50  | 4.33  | 0.0700 | 2.8107 | 3.1974 | 2.9241 |
| H-4 → L+6  | 2.37 | 5.91  | 2.46  | 0.0115 | 2.8101 | 3.1961 | 2.9232 |
| H-4 → L+7  | 2.10 | 5.08  | 1.98  | 0.0062 | 2.8100 | 3.1959 | 2.9234 |
| H-4 → L+8  | 2.19 | 7.43  | 3.45  | 0.0119 | 2.8082 | 3.1944 | 2.9221 |
| H-4 → L+9  | 4.19 | 9.96  | 18.04 | 0.0189 | 2.8115 | 3.1972 | 2.9247 |
| H-4 → L+10 | 4.05 | 8.10  | 13.15 | 0.0855 | 2.8084 | 3.1940 | 2.9222 |
| H-4 → L+11 | 2.49 | 8.28  | 1.78  | 0.0245 | 2.8066 | 3.1918 | 2.9217 |
| <hr/>      |      |       |       |        |        |        |        |
| H-5 → L    | 2.04 | 4.21  | 2.78  | 0.0064 | 2.8154 | 3.2030 | 2.9269 |
| H-5 → L+1  | 2.33 | 7.42  | 5.14  | 0.0209 | 2.8152 | 3.2011 | 2.9267 |
| H-5 → L+2  | 3.54 | 8.39  | 14.25 | 0.0085 | 2.8148 | 3.2013 | 2.9269 |
| H-5 → L+3  | 2.25 | 8.15  | 0.49  | 0.0230 | 2.8123 | 3.1981 | 2.9252 |
| H-5 → L+4  | 2.51 | 3.34  | 8.65  | 0.0399 | 2.8130 | 3.2000 | 2.9258 |
| H-5 → L+5  | 2.56 | 3.29  | 8.57  | 0.0750 | 2.8111 | 3.1987 | 2.9248 |
| H-5 → L+6  | 2.37 | 5.62  | 5.30  | 0.0889 | 2.8120 | 3.1986 | 2.9254 |
| H-5 → L+7  | 2.38 | 4.94  | 0.53  | 0.0279 | 2.8121 | 3.1990 | 2.9257 |
| H-5 → L+8  | 2.53 | 11.22 | 5.38  | 0.0049 | 2.8101 | 3.1954 | 2.9233 |
| H-5 → L+9  | 3.26 | 8.15  | 3.59  | 0.0052 | 2.8093 | 3.1953 | 2.9229 |
| H-5 → L+10 | 2.25 | 8.58  | 2.10  | 0.0355 | 2.8072 | 3.1932 | 2.9216 |
| H-5 → L+11 | 2.18 | 9.22  | 1.52  | 0.0146 | 2.8072 | 3.1934 | 2.9226 |
| <hr/>      |      |       |       |        |        |        |        |
| H-6 → L    | 2.27 | 4.14  | 4.08  | 0.0897 | 2.8117 | 3.1993 | 2.9233 |
| H-6 → L+1  | 2.21 | 6.43  | 5.55  | 0.0486 | 2.8128 | 3.1995 | 2.9241 |



|                        |      |       |       |        |        |        |        |
|------------------------|------|-------|-------|--------|--------|--------|--------|
| H-6 $\rightarrow$ L+2  | 2.13 | 8.02  | 3.42  | 0.0410 | 2.8121 | 3.1993 | 2.9240 |
| H-6 $\rightarrow$ L+3  | 2.26 | 8.72  | 1.68  | 0.0043 | 2.8093 | 3.1959 | 2.9213 |
| H-6 $\rightarrow$ L+4  | 2.12 | 3.46  | 2.10  | 0.0484 | 2.8093 | 3.1959 | 2.9219 |
| H-6 $\rightarrow$ L+5  | 2.13 | 2.65  | 3.06  | 0.0142 | 2.8090 | 3.1959 | 2.9228 |
| H-6 $\rightarrow$ L+6  | 2.43 | 5.30  | 6.22  | 0.0050 | 2.8084 | 3.1949 | 2.9215 |
| H-6 $\rightarrow$ L+7  | 2.33 | 3.29  | 6.45  | 0.0436 | 2.8070 | 3.1930 | 2.9206 |
| H-6 $\rightarrow$ L+8  | 2.31 | 5.85  | 0.84  | 0.0068 | 2.8045 | 3.1906 | 2.9182 |
| H-6 $\rightarrow$ L+9  | 4.31 | 9.54  | 15.92 | 0.0542 | 2.8078 | 3.1937 | 2.9211 |
| H-6 $\rightarrow$ L+10 | 2.95 | 8.68  | 6.70  | 0.0128 | 2.8032 | 3.1892 | 2.9174 |
| H-6 $\rightarrow$ L+11 | 2.97 | 11.88 | 4.13  | 0.0160 | 2.8121 | 3.1966 | 2.9234 |
| <hr/>                  |      |       |       |        |        |        |        |
| H-7 $\rightarrow$ L    | 2.17 | 7.04  | 5.27  | 0.0751 | 2.8111 | 3.1987 | 2.9229 |
| H-7 $\rightarrow$ L+1  | 2.48 | 6.77  | 6.33  | 0.0726 | 2.8125 | 3.1981 | 2.9240 |
| H-7 $\rightarrow$ L+2  | 2.00 | 7.74  | 1.29  | 0.0250 | 2.8095 | 3.1949 | 2.9212 |
| H-7 $\rightarrow$ L+3  | 2.16 | 8.75  | 0.66  | 0.0215 | 2.8102 | 3.1975 | 2.9226 |
| H-7 $\rightarrow$ L+4  | 2.26 | 5.50  | 5.07  | 0.0057 | 2.8110 | 3.1987 | 2.9239 |
| H-7 $\rightarrow$ L+5  | 2.46 | 2.88  | 4.91  | 0.0034 | 2.8078 | 3.1950 | 2.9215 |
| H-7 $\rightarrow$ L+6  | 2.47 | 5.17  | 2.70  | 0.0068 | 2.8066 | 3.1922 | 2.9193 |
| H-7 $\rightarrow$ L+7  | 2.24 | 3.21  | 1.64  | 0.0969 | 2.8079 | 3.1942 | 2.9213 |
| H-7 $\rightarrow$ L+8  | 2.37 | 6.73  | 1.81  | 0.0782 | 2.8054 | 3.1915 | 2.9188 |
| H-7 $\rightarrow$ L+9  | 5.20 | 9.59  | 16.98 | 0.0323 | 2.8073 | 3.1931 | 2.9205 |
| H-7 $\rightarrow$ L+10 | 3.52 | 8.79  | 10.64 | 0.0040 | 2.8063 | 3.1919 | 2.9201 |
| H-7 $\rightarrow$ L+11 | 2.47 | 8.49  | 5.61  | 0.0136 | 2.8033 | 3.1886 | 2.9183 |
| <hr/>                  |      |       |       |        |        |        |        |
| H-8 $\rightarrow$ L    | 2.65 | 6.92  | 9.40  | 0.0488 | 2.8139 | 3.2052 | 2.9263 |
| H-8 $\rightarrow$ L+1  | 3.41 | 6.95  | 13.17 | 0.0138 | 2.8149 | 3.2044 | 2.9271 |
| H-8 $\rightarrow$ L+2  | 2.84 | 8.50  | 8.16  | 0.0226 | 2.8150 | 3.2053 | 2.9279 |
| H-8 $\rightarrow$ L+3  | 2.88 | 8.74  | 7.22  | 0.0146 | 2.8138 | 3.2047 | 2.9269 |

|                        |      |      |       |        |        |        |        |
|------------------------|------|------|-------|--------|--------|--------|--------|
| H-8 $\rightarrow$ L+4  | 4.31 | 4.95 | 17.55 | 0.0197 | 2.8123 | 3.2019 | 2.9256 |
| H-8 $\rightarrow$ L+5  | 2.38 | 3.08 | 5.59  | 0.0604 | 2.8105 | 3.1992 | 2.9243 |
| H-8 $\rightarrow$ L+6  | 2.82 | 4.12 | 8.05  | 0.0053 | 2.8116 | 3.2016 | 2.9255 |
| H-8 $\rightarrow$ L+7  | 2.39 | 3.05 | 4.36  | 0.0107 | 2.8116 | 3.2024 | 2.9259 |
| H-8 $\rightarrow$ L+8  | 2.46 | 6.31 | 1.50  | 0.0007 | 2.8081 | 3.1982 | 2.9226 |
| H-8 $\rightarrow$ L+9  | 4.83 | 9.64 | 17.67 | 0.0009 | 2.8120 | 3.2013 | 2.9259 |
| H-8 $\rightarrow$ L+10 | 2.43 | 7.58 | 1.50  | 0.0073 | 2.8073 | 3.1970 | 2.9225 |
| H-8 $\rightarrow$ L+11 | 2.29 | 6.84 | 0.15  | 0.0760 | 2.8063 | 3.1957 | 2.9222 |
| <hr/>                  |      |      |       |        |        |        |        |
| H-9 $\rightarrow$ L    | 3.30 | 7.18 | 9.49  | 0.0465 | 2.8196 | 3.2057 | 2.9319 |
| H-9 $\rightarrow$ L+1  | 2.26 | 6.63 | 4.02  | 0.0197 | 2.8251 | 3.2097 | 2.9371 |
| H-9 $\rightarrow$ L+2  | 3.08 | 8.08 | 10.09 | 0.0107 | 2.8217 | 3.2065 | 2.9340 |
| H-9 $\rightarrow$ L+3  | 2.59 | 8.26 | 2.94  | 0.0638 | 2.8200 | 3.2050 | 2.9331 |
| H-9 $\rightarrow$ L+4  | 2.53 | 2.44 | 1.69  | 0.0224 | 2.8213 | 3.2072 | 2.9345 |
| H-9 $\rightarrow$ L+5  | 2.59 | 5.38 | 4.79  | 0.0489 | 2.8192 | 3.2047 | 2.9330 |
| H-9 $\rightarrow$ L+6  | 2.69 | 5.51 | 3.08  | 0.0270 | 2.8184 | 3.2034 | 2.9323 |
| H-9 $\rightarrow$ L+7  | 3.89 | 7.38 | 9.19  | 0.0117 | 2.8201 | 3.2058 | 2.9335 |
| H-9 $\rightarrow$ L+8  | 4.34 | 6.61 | 16.77 | 0.0206 | 2.8169 | 3.2016 | 2.9309 |
| H-9 $\rightarrow$ L+9  | 2.22 | 9.75 | 1.00  | 0.0541 | 2.8147 | 3.2004 | 2.9285 |
| H-9 $\rightarrow$ L+10 | 4.67 | 9.57 | 10.86 | 0.0026 | 2.8166 | 3.2009 | 2.9312 |
| H-9 $\rightarrow$ L+11 | 4.25 | 8.34 | 10.89 | 0.0822 | 2.8151 | 3.1994 | 2.9303 |
| <hr/>                  |      |      |       |        |        |        |        |
| H-10 $\rightarrow$ L   | 2.57 | 5.37 | 5.49  | 0.0791 | 2.8195 | 3.2054 | 2.9313 |
| H-10 $\rightarrow$ L+1 | 2.28 | 6.30 | 2.83  | 0.0111 | 2.8192 | 3.2032 | 2.9307 |
| H-10 $\rightarrow$ L+2 | 2.62 | 6.03 | 4.96  | 0.0681 | 2.8188 | 3.2036 | 2.9319 |
| H-10 $\rightarrow$ L+3 | 3.61 | 9.21 | 11.83 | 0.0370 | 2.8183 | 3.2034 | 2.9308 |
| H-10 $\rightarrow$ L+4 | 2.50 | 1.95 | 3.70  | 0.0073 | 2.8180 | 3.2035 | 2.9310 |
| H-10 $\rightarrow$ L+5 | 2.42 | 3.83 | 0.54  | 0.0093 | 2.8158 | 3.2016 | 2.9299 |

|                         |      |       |       |        |        |        |        |
|-------------------------|------|-------|-------|--------|--------|--------|--------|
| H-10 $\rightarrow$ L+6  | 2.37 | 5.80  | 0.85  | 0.0193 | 2.8155 | 3.2000 | 2.9289 |
| H-10 $\rightarrow$ L+7  | 2.53 | 3.32  | 3.17  | 0.0127 | 2.8158 | 3.2006 | 2.9295 |
| H-10 $\rightarrow$ L+8  | 4.21 | 7.96  | 11.64 | 0.0123 | 2.8153 | 3.1995 | 2.9287 |
| H-10 $\rightarrow$ L+9  | 3.91 | 10.13 | 13.03 | 0.0078 | 2.8147 | 3.1989 | 2.9280 |
| H-10 $\rightarrow$ L+10 | 3.93 | 6.58  | 10.10 | 0.0200 | 2.8136 | 3.1977 | 2.9279 |
| H-10 $\rightarrow$ L+11 | 2.45 | 8.37  | 2.71  | 0.0385 | 2.8106 | 3.1945 | 2.9259 |
| <hr/>                   |      |       |       |        |        |        |        |
| H-11 $\rightarrow$ L    | 2.39 | 2.96  | 6.08  | 0.0072 | 2.8227 | 3.2087 | 2.9347 |
| H-11 $\rightarrow$ L+1  | 2.95 | 6.25  | 9.43  | 0.0268 | 2.8235 | 3.2077 | 2.9349 |
| H-11 $\rightarrow$ L+2  | 3.59 | 6.12  | 14.12 | 0.0103 | 2.8222 | 3.2077 | 2.9351 |
| H-11 $\rightarrow$ L+3  | 2.97 | 8.35  | 8.52  | 0.0291 | 2.8218 | 3.2066 | 2.9342 |
| H-11 $\rightarrow$ L+4  | 2.48 | 8.28  | 1.77  | 0.0143 | 2.8066 | 3.1918 | 2.9217 |
| H-11 $\rightarrow$ L+5  | 2.81 | 4.33  | 6.57  | 0.0314 | 2.8180 | 3.2034 | 2.9321 |
| H-11 $\rightarrow$ L+6  | 2.69 | 5.65  | 5.25  | 0.0712 | 2.8190 | 3.2035 | 2.9326 |
| H-11 $\rightarrow$ L+7  | 2.94 | 4.10  | 7.58  | 0.0172 | 2.8194 | 3.2041 | 2.9329 |
| H-11 $\rightarrow$ L+8  | 2.39 | 7.55  | 2.44  | 0.0078 | 2.8161 | 3.2003 | 2.9299 |
| H-11 $\rightarrow$ L+9  | 2.44 | 5.29  | 2.42  | 0.0226 | 2.8183 | 3.2036 | 2.9312 |
| H-11 $\rightarrow$ L+10 | 2.81 | 11.22 | 3.59  | 0.0416 | 2.8122 | 3.1991 | 2.9251 |
| H-11 $\rightarrow$ L+11 | 2.57 | 3.72  | 2.78  |        | 2.8152 | 3.2032 | 2.9285 |
| <hr/>                   |      |       |       |        |        |        |        |
| Ground state            | -    | 1.58  | 0.26  | -      | 2.8196 | 3.2079 | 2.9297 |
| <hr/>                   |      |       |       |        |        |        |        |

Table S4: Particle-hole state, excitation energy ( $E_{ex}$ , magnetic anisotropy energy (MAE), Dipole moment, Average spin-charge on Cr sites for  $\text{CrI}_3$  for singly excited states spin flip particle-hole state.

| Transition            | E (eV) | MAE (K) | Dipole (D) | Spin charge (e) |          |        |
|-----------------------|--------|---------|------------|-----------------|----------|--------|
|                       |        |         |            | Integrated      | Mulliken | Lowdin |
| H $\rightarrow$ L     | 2.14   | 64.31   | 1.51       | 2.7565          | 3.2594   | 2.893  |
| H $\rightarrow$ L+1   | 2.15   | 64.63   | 1.68       | 2.7607          | 3.2646   | 2.8992 |
| H $\rightarrow$ L+2   | 2.24   | 57.65   | 0.72       | 2.7640          | 3.2682   | 2.9034 |
| H $\rightarrow$ L+3   | 2.17   | 50.10   | 0.61       | 2.7654          | 3.2705   | 2.9058 |
| H $\rightarrow$ L+4   | 2.17   | 51.32   | 1.54       | 2.7624          | 3.2672   | 2.9023 |
| H $\rightarrow$ L+5   | 2.18   | 70.99   | 2.00       | 2.7521          | 3.2591   | 2.8981 |
| H $\rightarrow$ L+6   | 2.20   | 69.31   | 1.43       | 2.7449          | 3.2554   | 2.8903 |
| H $\rightarrow$ L+7   | 2.13   | 61.05   | 0.89       | 2.7535          | 3.2608   | 2.8964 |
| H $\rightarrow$ L+8   | 2.24   | 64.61   | 3.28       | 2.7478          | 3.2559   | 2.8925 |
| H $\rightarrow$ L+9   | 2.33   | 113.73  | 2.25       | 2.7576          | 3.2682   | 2.9049 |
| H $\rightarrow$ L+10  | 2.41   | 58.15   | 3.02       | 2.7404          | 3.2487   | 2.8847 |
| H $\rightarrow$ L+11  | 2.43   | 61.63   | 4.20       | 2.7420          | 3.2552   | 2.8917 |
| H-1 $\rightarrow$ L   | 2.17   | 73.52   | 0.41       | 2.7617          | 3.2637   | 2.898  |
| H-1 $\rightarrow$ L+1 | 2.26   | 69.42   | 2.01       | 2.7639          | 3.2669   | 2.9021 |
| H-1 $\rightarrow$ L+2 | 2.22   | 65.35   | 2.35       | 2.7663          | 3.2704   | 2.906  |
| H-1 $\rightarrow$ L+3 | 2.18   | 63.73   | 1.89       | 2.7653          | 3.2702   | 2.9073 |
| H-1 $\rightarrow$ L+4 | 2.18   | 65.54   | 1.56       | 2.7609          | 3.2652   | 2.9023 |
| H-1 $\rightarrow$ L+5 | 2.22   | 68.47   | 2.26       | 2.7637          | 3.268    | 2.907  |
| H-1 $\rightarrow$ L+6 | 2.27   | 79.55   | 2.75       | 2.7473          | 3.2569   | 2.8926 |
| H-1 $\rightarrow$ L+7 | 2.41   | 72.96   | 4.00       | 2.7603          | 3.2686   | 2.9035 |
| H-1 $\rightarrow$ L+8 | 2.18   | 76.99   | 1.70       | 2.7534          | 3.2599   | 2.8958 |
| H-1 $\rightarrow$ L+9 | 2.33   | 106.93  | 1.67       | 2.7585          | 3.2694   | 2.9069 |

|                        |      |        |      |        |        |        |
|------------------------|------|--------|------|--------|--------|--------|
| H-1 $\rightarrow$ L+10 | 2.34 | 65.26  | 2.30 | 2.7440 | 3.251  | 2.8874 |
| H-1 $\rightarrow$ L+11 | 2.76 | 74.08  | 6.79 | 2.7536 | 3.2653 | 2.9006 |
| H-2 $\rightarrow$ L    | 2.36 | 124.29 | 2.32 | 2.7778 | 3.2814 | 2.9182 |
| H-2 $\rightarrow$ L+1  | 2.46 | 114.06 | 6.70 | 2.7786 | 3.2835 | 2.9216 |
| H-2 $\rightarrow$ L+2  | 2.52 | 106.06 | 6.05 | 2.7806 | 3.2864 | 2.9245 |
| H-2 $\rightarrow$ L+3  | 2.41 | 112.39 | 4.58 | 2.7835 | 3.2896 | 2.9284 |
| H-2 $\rightarrow$ L+4  | 2.28 | 113.07 | 0.46 | 2.7760 | 3.2826 | 2.9222 |
| H-2 $\rightarrow$ L+5  | 2.25 | 120.22 | 3.62 | 2.7662 | 3.2747 | 2.9184 |
| H-2 $\rightarrow$ L+6  | 2.31 | 130.84 | 2.48 | 2.7568 | 3.2698 | 2.9096 |
| H-2 $\rightarrow$ L+7  | 2.49 | 126.22 | 4.15 | 2.7799 | 3.2877 | 2.9252 |
| H-2 $\rightarrow$ L+8  | 2.34 | 123.96 | 0.99 | 2.7656 | 3.2742 | 2.9135 |
| H-2 $\rightarrow$ L+9  | 2.37 | 181.33 | 0.50 | 2.7709 | 3.2838 | 2.9251 |
| H-2 $\rightarrow$ L+10 | 2.41 | 121.42 | 2.36 | 2.7551 | 3.2652 | 2.9053 |
| H-2 $\rightarrow$ L+11 | 3.03 | 128.06 | 8.49 | 2.7820 | 3.2932 | 2.9287 |
| H-3 $\rightarrow$ L    | 2.33 | 112.22 | 5.23 | 2.7721 | 3.277  | 2.9145 |
| H-3 $\rightarrow$ L+1  | 2.46 | 118.99 | 4.52 | 2.7804 | 3.2856 | 2.9239 |
| H-3 $\rightarrow$ L+2  | 2.44 | 107.23 | 3.82 | 2.7847 | 3.2905 | 2.9287 |
| H-3 $\rightarrow$ L+3  | 2.33 | 106.09 | 3.12 | 2.7806 | 3.2873 | 2.9262 |
| H-3 $\rightarrow$ L+4  | 2.28 | 106.74 | 3.11 | 2.7750 | 3.2821 | 2.9219 |
| H-3 $\rightarrow$ L+5  | 2.25 | 124.56 | 1.02 | 2.7678 | 3.276  | 2.9192 |
| H-3 $\rightarrow$ L+6  | 2.32 | 125.83 | 3.42 | 2.7550 | 3.2686 | 2.9086 |
| H-3 $\rightarrow$ L+7  | 2.48 | 123.38 | 1.91 | 2.7800 | 3.2888 | 2.9262 |
| H-3 $\rightarrow$ L+8  | 2.27 | 103.50 | 1.76 | 2.7602 | 3.2701 | 2.9102 |
| H-3 $\rightarrow$ L+9  | 2.39 | 176.99 | 2.14 | 2.7724 | 3.2852 | 2.9258 |
| H-3 $\rightarrow$ L+10 | 2.49 | 108.67 | 3.97 | 2.7550 | 3.2649 | 2.9046 |
| H-3 $\rightarrow$ L+11 | 2.72 | 108.06 | 8.19 | 2.7548 | 3.271  | 2.9121 |

|            |      |        |      |        |        |        |
|------------|------|--------|------|--------|--------|--------|
| H-4 → L    | 2.32 | 46.18  | 2.38 | 2.7588 | 3.2639 | 2.9014 |
| H-4 → L+1  | 2.53 | 57.52  | 5.00 | 2.7762 | 3.2816 | 2.9191 |
| H-4 → L+2  | 2.53 | 64.83  | 4.33 | 2.7831 | 3.289  | 2.9263 |
| H-4 → L+3  | 2.52 | 51.66  | 2.34 | 2.7841 | 3.2901 | 2.9274 |
| H-4 → L+4  | 2.51 | 52.84  | 1.59 | 2.7824 | 3.2875 | 2.9239 |
| H-4 → L+5  | 2.47 | 59.70  | 1.99 | 2.7750 | 3.281  | 2.9212 |
| H-4 → L+6  | 2.47 | 64.34  | 3.11 | 2.7614 | 3.2732 | 2.9111 |
| H-4 → L+7  | 2.87 | 61.15  | 4.46 | 2.7751 | 3.2838 | 2.92   |
| H-4 → L+8  | 2.62 | 64.07  | 1.44 | 2.7702 | 3.2774 | 2.9141 |
| H-4 → L+9  | 2.78 | 108.89 | 0.81 | 2.7764 | 3.2876 | 2.9254 |
| H-4 → L+10 | 2.56 | 71.72  | 2.99 | 2.7503 | 3.2623 | 2.9024 |
| H-4 → L+11 | 2.90 | 89.57  | 5.44 | 2.7485 | 3.2638 | 2.905  |
| <hr/>      |      |        |      |        |        |        |
| H-5 → L    | 2.38 | 95.05  | 3.45 | 2.7630 | 3.2658 | 2.9004 |
| H-5 → L+1  | 2.41 | 98.53  | 4.10 | 2.7638 | 3.2673 | 2.9028 |
| H-5 → L+2  | 2.32 | 75.08  | 2.32 | 2.7602 | 3.2642 | 2.9001 |
| H-5 → L+3  | 2.29 | 86.36  | 2.43 | 2.7641 | 3.2691 | 2.9056 |
| H-5 → L+4  | 2.32 | 83.98  | 0.97 | 2.7637 | 3.268  | 2.9039 |
| H-5 → L+5  | 2.43 | 96.53  | 3.96 | 2.7593 | 3.2645 | 2.9032 |
| H-5 → L+6  | 2.39 | 101.69 | 2.24 | 2.7476 | 3.2571 | 2.8923 |
| H-5 → L+7  | 2.45 | 99.31  | 1.86 | 2.7585 | 3.2658 | 2.9014 |
| H-5 → L+8  | 2.43 | 93.80  | 2.24 | 2.7455 | 3.2531 | 2.8902 |
| H-5 → L+9  | 2.46 | 151.28 | 2.03 | 2.7624 | 3.2723 | 2.909  |
| H-5 → L+10 | 2.53 | 83.56  | 3.63 | 2.7327 | 3.2425 | 2.8815 |
| H-5 → L+11 | 2.50 | 87.69  | 6.14 | 2.7296 | 3.2429 | 2.8822 |
| <hr/>      |      |        |      |        |        |        |
| H-6 → L    | 2.64 | 78.00  | 8.87 | 2.7741 | 3.2779 | 2.9141 |
| H-6 → L+1  | 2.67 | 72.99  | 8.43 | 2.7786 | 3.2836 | 2.921  |

|            |      |        |      |        |        |        |
|------------|------|--------|------|--------|--------|--------|
| H-6 → L+2  | 2.71 | 81.32  | 9.31 | 2.7769 | 3.2816 | 2.9189 |
| H-6 → L+3  | 2.53 | 64.78  | 4.99 | 2.7689 | 3.2749 | 2.9135 |
| H-6 → L+4  | 2.58 | 69.57  | 6.02 | 2.7744 | 3.2793 | 2.9169 |
| H-6 → L+5  | 2.56 | 72.77  | 6.93 | 2.7703 | 3.2765 | 2.9167 |
| H-6 → L+6  | 2.57 | 73.38  | 5.97 | 2.7580 | 3.27   | 2.9089 |
| H-6 → L+7  | 2.76 | 85.52  | 8.64 | 2.7701 | 3.2782 | 2.9148 |
| H-6 → L+8  | 2.60 | 76.97  | 4.64 | 2.7578 | 3.2669 | 2.9065 |
| H-6 → L+9  | 2.60 | 113.75 | 4.55 | 2.7661 | 3.2771 | 2.9159 |
| H-6 → L+10 | 2.79 | 72.22  | 6.65 | 2.7519 | 3.2624 | 2.9016 |
| H-6 → L+11 | 2.88 | 83.06  | 7.68 | 2.7546 | 3.2687 | 2.9093 |
| <hr/>      |      |        |      |        |        |        |
| H-7 → L    | 2.35 | 30.15  | 1.40 | 2.7467 | 3.248  | 2.8831 |
| H-7 → L+1  | 2.41 | 27.92  | 2.57 | 2.7501 | 3.2514 | 2.8872 |
| H-7 → L+2  | 2.30 | 29.28  | 1.09 | 2.7523 | 3.2548 | 2.8917 |
| H-7 → L+3  | 2.44 | 32.51  | 4.17 | 2.7562 | 3.2597 | 2.8971 |
| H-7 → L+4  | 2.38 | 34.50  | 1.76 | 2.7545 | 3.2568 | 2.8931 |
| H-7 → L+5  | 2.70 | 38.99  | 7.07 | 2.7590 | 3.261  | 2.8981 |
| H-7 → L+6  | 2.46 | 35.12  | 1.88 | 2.7375 | 3.2451 | 2.8808 |
| H-7 → L+7  | 2.48 | 39.35  | 2.55 | 2.7482 | 3.2538 | 2.8903 |
| H-7 → L+8  | 2.43 | 36.70  | 1.02 | 2.7399 | 3.2452 | 2.8822 |
| H-7 → L+9  | 2.54 | 62.62  | 1.55 | 2.7443 | 3.2526 | 2.8908 |
| H-7 → L+10 | 2.54 | 27.53  | 3.03 | 2.7373 | 3.2426 | 2.8784 |
| H-7 → L+11 | 2.60 | 26.24  | 1.99 | 2.7345 | 3.2456 | 2.8834 |
| <hr/>      |      |        |      |        |        |        |
| H-8 → L    | 2.54 | 75.14  | 2.76 | 2.7678 | 3.2699 | 2.9062 |
| H-8 → L+1  | 2.62 | 71.24  | 2.83 | 2.7736 | 3.2764 | 2.9137 |
| H-8 → L+2  | 2.62 | 67.98  | 4.60 | 2.7747 | 3.2778 | 2.9154 |
| H-8 → L+3  | 2.44 | 62.84  | 1.52 | 2.7675 | 3.2713 | 2.9088 |

|                        |      |        |      |        |        |        |
|------------------------|------|--------|------|--------|--------|--------|
| H-8 $\rightarrow$ L+4  | 2.54 | 65.61  | 1.77 | 2.7713 | 3.2744 | 2.9116 |
| H-8 $\rightarrow$ L+5  | 2.50 | 76.23  | 1.73 | 2.7546 | 3.2602 | 2.9014 |
| H-8 $\rightarrow$ L+6  | 2.74 | 78.95  | 3.64 | 2.7577 | 3.266  | 2.9024 |
| H-8 $\rightarrow$ L+7  | 2.69 | 73.26  | 5.69 | 2.7676 | 3.2748 | 2.9122 |
| H-8 $\rightarrow$ L+8  | 2.64 | 78.01  | 3.90 | 2.7531 | 3.2596 | 2.8975 |
| H-8 $\rightarrow$ L+9  | 2.60 | 113.27 | 0.66 | 2.7601 | 3.2698 | 2.9091 |
| H-8 $\rightarrow$ L+10 | 2.85 | 70.70  | 5.89 | 2.7483 | 3.2554 | 2.8933 |
| H-8 $\rightarrow$ L+11 | 2.82 | 77.08  | 4.70 | 2.7494 | 3.2631 | 2.9043 |
| <hr/>                  |      |        |      |        |        |        |
| H-9 $\rightarrow$ L    | 2.53 | 37.38  | 1.66 | 2.7662 | 3.2685 | 2.9043 |
| H-9 $\rightarrow$ L+1  | 2.48 | 34.02  | 1.85 | 2.7680 | 3.2708 | 2.9074 |
| H-9 $\rightarrow$ L+2  | 2.59 | 51.48  | 7.13 | 2.7710 | 3.2754 | 2.9125 |
| H-9 $\rightarrow$ L+3  | 2.45 | 29.20  | 4.17 | 2.7717 | 3.2765 | 2.9142 |
| H-9 $\rightarrow$ L+4  | 2.49 | 15.92  | 2.30 | 2.7708 | 3.2749 | 2.9119 |
| H-9 $\rightarrow$ L+5  | 2.49 | 40.42  | 6.13 | 2.7571 | 3.2638 | 2.9049 |
| H-9 $\rightarrow$ L+6  | 2.55 | 38.67  | 2.34 | 2.7566 | 3.2653 | 2.9013 |
| H-9 $\rightarrow$ L+7  | 2.67 | 34.14  | 4.91 | 2.7661 | 3.2726 | 2.9093 |
| H-9 $\rightarrow$ L+8  | 2.57 | 55.36  | 3.06 | 2.7551 | 3.2629 | 2.9012 |
| H-9 $\rightarrow$ L+9  | 2.56 | 93.45  | 2.76 | 2.7631 | 3.2734 | 2.9124 |
| H-9 $\rightarrow$ L+10 | 2.68 | 32.58  | 1.82 | 2.7465 | 3.2542 | 2.892  |
| H-9 $\rightarrow$ L+11 | 2.91 | 49.46  | 8.52 | 2.7573 | 3.2686 | 2.9049 |
| <hr/>                  |      |        |      |        |        |        |
| H-10 $\rightarrow$ L   | 2.49 | 42.45  | 4.04 | 2.7530 | 3.2541 | 2.8904 |
| H-10 $\rightarrow$ L+1 | 2.69 | 52.71  | 6.59 | 2.7596 | 3.2625 | 2.8997 |
| H-10 $\rightarrow$ L+2 | 2.49 | 29.21  | 5.22 | 2.7601 | 3.2635 | 2.9005 |
| H-10 $\rightarrow$ L+3 | 2.45 | 29.83  | 1.84 | 2.7602 | 3.263  | 2.9004 |
| H-10 $\rightarrow$ L+4 | 2.43 | 24.38  | 3.05 | 2.7607 | 3.2627 | 2.8993 |
| H-10 $\rightarrow$ L+5 | 2.62 | 38.52  | 7.00 | 2.7443 | 3.249  | 2.8897 |



|                         |      |        |       |        |        |        |
|-------------------------|------|--------|-------|--------|--------|--------|
| H-10 $\rightarrow$ L+6  | 2.72 | 45.37  | 6.81  | 2.7408 | 3.2494 | 2.8869 |
| H-10 $\rightarrow$ L+7  | 2.95 | 41.72  | 9.81  | 2.7564 | 3.2613 | 2.8981 |
| H-10 $\rightarrow$ L+8  | 2.67 | 36.71  | 4.83  | 2.7461 | 3.2514 | 2.8879 |
| H-10 $\rightarrow$ L+9  | 2.51 | 82.06  | 2.79  | 2.7466 | 3.256  | 2.8956 |
| H-10 $\rightarrow$ L+10 | 2.79 | 34.10  | 6.94  | 2.7358 | 3.2422 | 2.88   |
| H-10 $\rightarrow$ L+11 | 3.67 | 33.68  | 15.57 | 2.7529 | 3.2622 | 2.8974 |
| <hr/>                   |      |        |       |        |        |        |
| H-11 $\rightarrow$ L    | 2.47 | 55.85  | 4.02  | 2.7555 | 3.2581 | 2.8933 |
| H-11 $\rightarrow$ L+1  | 2.46 | 55.98  | 3.63  | 2.7596 | 3.2623 | 2.8992 |
| H-11 $\rightarrow$ L+2  | 2.50 | 43.61  | 2.67  | 2.7580 | 3.2617 | 2.8988 |
| H-11 $\rightarrow$ L+3  | 2.51 | 65.15  | 3.24  | 2.7673 | 3.2722 | 2.9093 |
| H-11 $\rightarrow$ L+4  | 2.47 | 48.41  | 1.25  | 2.7623 | 3.2663 | 2.9031 |
| H-11 $\rightarrow$ L+5  | 2.54 | 68.04  | 3.28  | 2.7518 | 3.2588 | 2.8994 |
| H-11 $\rightarrow$ L+6  | 2.57 | 65.27  | 2.19  | 2.7422 | 3.252  | 2.8891 |
| H-11 $\rightarrow$ L+7  | 2.51 | 59.96  | 1.44  | 2.7523 | 3.2593 | 2.8967 |
| H-11 $\rightarrow$ L+8  | 2.69 | 68.08  | 3.79  | 2.7528 | 3.2599 | 2.8984 |
| H-11 $\rightarrow$ L+9  | 2.68 | 114.93 | 1.31  | 2.7586 | 3.2683 | 2.9064 |
| H-11 $\rightarrow$ L+10 | 2.73 | 57.12  | 2.55  | 2.7442 | 3.2514 | 2.8884 |
| H-11 $\rightarrow$ L+11 | 2.64 | 54.52  | 0.64  | 2.7336 | 3.2458 | 2.8851 |
| <hr/>                   |      |        |       |        |        |        |
| Ground state            | -    | 68.47  | 0.62  | 2.9768 | 3.4832 | 3.1137 |
| <hr/> <hr/>             |      |        |       |        |        |        |

Table S5: Particle-hole state, excitation energy ( $E_{ex}$ , magnetic anisotropy energy (MAE), Dipole moment, Average spin-charge on Cr sites for  $\text{CrBr}_3$  for singly excited states spin flip particle-hole state.

| Transition            | E (eV) | MAE (K) | Dipole (D) | Spin charge (e) |          |        |
|-----------------------|--------|---------|------------|-----------------|----------|--------|
|                       |        |         |            | Integrated      | Mulliken | Lowdin |
| H $\rightarrow$ L     | 2.24   | 13.90   | 0.47       | 2.6559          | 3.0695   | 2.7641 |
| H $\rightarrow$ L+1   | 2.29   | 9.80    | 1.34       | 2.6565          | 3.0704   | 2.7653 |
| H $\rightarrow$ L+2   | 2.30   | 12.82   | 1.01       | 2.6536          | 3.0692   | 2.7617 |
| H $\rightarrow$ L+3   | 2.33   | 14.84   | 1.91       | 2.6543          | 3.0704   | 2.7628 |
| H $\rightarrow$ L+4   | 2.20   | 12.92   | 1.67       | 2.6434          | 3.0563   | 2.7483 |
| H $\rightarrow$ L+5   | 2.33   | 12.04   | 1.07       | 2.6555          | 3.0713   | 2.7667 |
| H $\rightarrow$ L+6   | 2.34   | 14.30   | 2.01       | 2.6446          | 3.0612   | 2.7551 |
| H $\rightarrow$ L+7   | 2.46   | 13.99   | 2.50       | 2.6466          | 3.0642   | 2.7573 |
| H $\rightarrow$ L+8   | 2.52   | 21.84   | 2.49       | 2.6420          | 3.0602   | 2.7536 |
| H $\rightarrow$ L+9   | 2.49   | 19.38   | 0.82       | 2.6520          | 3.0695   | 2.7663 |
| H $\rightarrow$ L+10  | 2.69   | 7.78    | 1.73       | 2.6394          | 3.0573   | 2.7492 |
| H $\rightarrow$ L+11  | 2.61   | 18.53   | 1.00       | 2.6446          | 3.0664   | 2.7603 |
| H-1 $\rightarrow$ L   | 2.25   | 11.62   | 0.30       | 2.6556          | 3.0697   | 2.7649 |
| H-1 $\rightarrow$ L+1 | 2.24   | 12.26   | 0.65       | 2.6544          | 3.0681   | 2.7632 |
| H-1 $\rightarrow$ L+2 | 2.26   | 13.28   | 0.22       | 2.6533          | 3.0693   | 2.7626 |
| H-1 $\rightarrow$ L+3 | 2.32   | 13.89   | 1.23       | 2.6533          | 3.069    | 2.7617 |
| H-1 $\rightarrow$ L+4 | 2.18   | 13.81   | 1.35       | 2.6424          | 3.0556   | 2.7485 |
| H-1 $\rightarrow$ L+5 | 2.31   | 21.29   | 1.15       | 2.6536          | 3.0688   | 2.7646 |
| H-1 $\rightarrow$ L+6 | 2.31   | 13.86   | 1.54       | 2.6426          | 3.0591   | 2.7541 |
| H-1 $\rightarrow$ L+7 | 2.25   | 13.87   | 1.91       | 2.6388          | 3.0551   | 2.7506 |
| H-1 $\rightarrow$ L+8 | 2.44   | 21.22   | 1.65       | 2.6411          | 3.0596   | 2.7536 |
| H-1 $\rightarrow$ L+9 | 2.50   | 19.07   | 1.42       | 2.6539          | 3.0716   | 2.768  |

|                        |      |       |      |        |        |        |
|------------------------|------|-------|------|--------|--------|--------|
| H-1 $\rightarrow$ L+10 | 2.67 | 8.26  | 3.53 | 2.6339 | 3.0529 | 2.747  |
| H-1 $\rightarrow$ L+11 | 2.35 | 20.37 | 1.63 | 2.6445 | 3.0642 | 2.7608 |
| H-2 $\rightarrow$ L    | 2.27 | 13.42 | 0.36 | 2.6441 | 3.0549 | 2.7509 |
| H-2 $\rightarrow$ L+1  | 2.27 | 11.43 | 0.25 | 2.6443 | 3.0551 | 2.7512 |
| H-2 $\rightarrow$ L+2  | 2.28 | 11.91 | 0.33 | 2.6421 | 3.055  | 2.7486 |
| H-2 $\rightarrow$ L+3  | 2.29 | 12.53 | 0.52 | 2.6421 | 3.0552 | 2.7488 |
| H-2 $\rightarrow$ L+4  | 2.40 | 8.54  | 0.35 | 2.6327 | 3.0426 | 2.7356 |
| H-2 $\rightarrow$ L+5  | 2.43 | 10.36 | 0.28 | 2.6449 | 3.0577 | 2.7544 |
| H-2 $\rightarrow$ L+6  | 2.68 | 10.61 | 1.94 | 2.6343 | 3.0473 | 2.7423 |
| H-2 $\rightarrow$ L+7  | 2.66 | 10.42 | 1.78 | 2.6344 | 3.0475 | 2.7421 |
| H-2 $\rightarrow$ L+8  | 2.52 | 17.87 | 1.29 | 2.6316 | 3.0467 | 2.741  |
| H-2 $\rightarrow$ L+9  | 2.44 | 16.53 | 0.78 | 2.6432 | 3.0576 | 2.7551 |
| H-2 $\rightarrow$ L+10 | 2.76 | 2.74  | 0.29 | 2.6279 | 3.0429 | 2.7361 |
| H-2 $\rightarrow$ L+11 | 2.62 | 15.07 | 0.44 | 2.6369 | 3.0542 | 2.7491 |
| H-3 $\rightarrow$ L    | 2.48 | 13.11 | 2.99 | 2.6468 | 3.0565 | 2.7537 |
| H-3 $\rightarrow$ L+1  | 2.39 | 12.36 | 0.80 | 2.6460 | 3.056  | 2.7536 |
| H-3 $\rightarrow$ L+2  | 2.42 | 15.40 | 1.99 | 2.6441 | 3.0558 | 2.7509 |
| H-3 $\rightarrow$ L+3  | 2.54 | 16.31 | 3.70 | 2.6453 | 3.0573 | 2.7522 |
| H-3 $\rightarrow$ L+4  | 2.47 | 14.84 | 1.13 | 2.6335 | 3.0426 | 2.7375 |
| H-3 $\rightarrow$ L+5  | 2.51 | 15.22 | 2.35 | 2.6462 | 3.058  | 2.7558 |
| H-3 $\rightarrow$ L+6  | 3.46 | 13.11 | 3.28 | 2.6446 | 3.0575 | 2.7515 |
| H-3 $\rightarrow$ L+7  | 2.53 | 15.72 | 1.12 | 2.6369 | 3.0492 | 2.7449 |
| H-3 $\rightarrow$ L+8  | 2.72 | 23.48 | 4.22 | 2.6327 | 3.047  | 2.7428 |
| H-3 $\rightarrow$ L+9  | 2.46 | 20.73 | 0.64 | 2.6423 | 3.0556 | 2.7549 |
| H-3 $\rightarrow$ L+10 | 2.92 | 8.74  | 1.45 | 2.6302 | 3.0442 | 2.7386 |
| H-3 $\rightarrow$ L+11 | 2.91 | 20.49 | 2.97 | 2.6388 | 3.0557 | 2.7516 |

|            |      |       |      |        |        |        |
|------------|------|-------|------|--------|--------|--------|
| H-4 → L    | 2.49 | 15.55 | 3.52 | 2.6434 | 3.0537 | 2.7495 |
| H-4 → L+1  | 2.48 | 8.99  | 4.29 | 2.6437 | 3.0544 | 2.7504 |
| H-4 → L+2  | 2.39 | 15.71 | 1.83 | 2.6401 | 3.0523 | 2.7462 |
| H-4 → L+3  | 2.43 | 13.62 | 0.80 | 2.6409 | 3.0537 | 2.7476 |
| H-4 → L+4  | 2.41 | 14.58 | 0.77 | 2.6295 | 3.0393 | 2.7329 |
| H-4 → L+5  | 2.45 | 12.56 | 0.79 | 2.6426 | 3.055  | 2.7517 |
| H-4 → L+6  | 2.40 | 15.97 | 0.21 | 2.6324 | 3.0452 | 2.7403 |
| H-4 → L+7  | 3.57 | 14.94 | 0.86 | 2.6397 | 3.0525 | 2.7459 |
| H-4 → L+8  | 2.63 | 22.30 | 3.70 | 2.6287 | 3.0437 | 2.7384 |
| H-4 → L+9  | 2.52 | 19.33 | 0.80 | 2.6390 | 3.053  | 2.751  |
| H-4 → L+10 | 2.72 | 9.70  | 1.33 | 2.6172 | 3.0322 | 2.7283 |
| H-4 → L+11 | 2.82 | 19.28 | 2.99 | 2.6324 | 3.0507 | 2.7453 |
| <hr/>      |      |       |      |        |        |        |
| H-5 → L    | 2.37 | 10.74 | 1.42 | 2.6443 | 3.0547 | 2.7518 |
| H-5 → L+1  | 2.55 | 13.78 | 5.22 | 2.6450 | 3.055  | 2.7518 |
| H-5 → L+2  | 2.41 | 13.54 | 0.40 | 2.6424 | 3.0547 | 2.7498 |
| H-5 → L+3  | 2.43 | 15.67 | 4.85 | 2.6407 | 3.0527 | 2.7476 |
| H-5 → L+4  | 2.42 | 15.67 | 1.19 | 2.6313 | 3.0411 | 2.7358 |
| H-5 → L+5  | 2.46 | 23.83 | 2.23 | 2.6413 | 3.0528 | 2.7508 |
| H-5 → L+6  | 2.59 | 13.83 | 0.76 | 2.6355 | 3.0484 | 2.7446 |
| H-5 → L+7  | 2.54 | 14.58 | 1.86 | 2.6355 | 3.0479 | 2.7437 |
| H-5 → L+8  | 2.53 | 21.99 | 1.66 | 2.6301 | 3.0448 | 2.7405 |
| H-5 → L+9  | 2.53 | 19.68 | 1.99 | 2.6424 | 3.0565 | 2.7546 |
| H-5 → L+10 | 2.85 | 10.19 | 3.69 | 2.6189 | 3.0346 | 2.7315 |
| H-5 → L+11 | 2.70 | 17.29 | 1.13 | 2.6383 | 3.0542 | 2.7508 |
| <hr/>      |      |       |      |        |        |        |
| H-6 → L    | 2.35 | 11.62 | 2.11 | 2.6406 | 3.0503 | 2.7474 |
| H-6 → L+1  | 2.46 | 15.05 | 2.86 | 2.6414 | 3.0513 | 2.7486 |

|            |      |       |      |        |        |        |
|------------|------|-------|------|--------|--------|--------|
| H-6 → L+2  | 2.41 | 17.58 | 2.19 | 2.6384 | 3.0502 | 2.745  |
| H-6 → L+3  | 2.43 | 13.95 | 2.35 | 2.6385 | 3.0506 | 2.7454 |
| H-6 → L+4  | 2.47 | 14.42 | 1.93 | 2.6289 | 3.0379 | 2.7321 |
| H-6 → L+5  | 2.43 | 15.36 | 1.84 | 2.6411 | 3.0531 | 2.7508 |
| H-6 → L+6  | 2.74 | 14.94 | 3.44 | 2.6303 | 3.0424 | 2.7387 |
| H-6 → L+7  | 2.91 | 14.85 | 4.58 | 2.6313 | 3.0438 | 2.7397 |
| H-6 → L+8  | 2.78 | 22.29 | 4.07 | 2.6275 | 3.0416 | 2.7372 |
| H-6 → L+9  | 2.57 | 21.06 | 1.28 | 2.6386 | 3.0517 | 2.7508 |
| H-6 → L+10 | 2.74 | 8.61  | 2.20 | 2.6243 | 3.0384 | 2.7327 |
| H-6 → L+11 | 2.86 | 16.65 | 3.30 | 2.6321 | 3.0488 | 2.7448 |
| <hr/>      |      |       |      |        |        |        |
| H-7 → L    | 2.40 | 17.74 | 0.76 | 2.6378 | 3.0473 | 2.7452 |
| H-7 → L+1  | 2.34 | 10.58 | 1.51 | 2.6375 | 3.0469 | 2.7446 |
| H-7 → L+2  | 2.37 | 13.72 | 0.81 | 2.6361 | 3.0477 | 2.7432 |
| H-7 → L+3  | 2.41 | 18.44 | 1.01 | 2.6371 | 3.0489 | 2.7438 |
| H-7 → L+4  | 2.55 | 14.56 | 1.49 | 2.6268 | 3.0355 | 2.7302 |
| H-7 → L+5  | 2.51 | 15.34 | 2.38 | 2.6401 | 3.0516 | 2.7494 |
| H-7 → L+6  | 2.65 | 15.02 | 1.84 | 2.6270 | 3.0382 | 2.7354 |
| H-7 → L+7  | 2.62 | 14.69 | 0.66 | 2.6280 | 3.0397 | 2.7366 |
| H-7 → L+8  | 2.64 | 21.95 | 1.53 | 2.6252 | 3.0389 | 2.735  |
| H-7 → L+9  | 2.69 | 20.80 | 3.87 | 2.6368 | 3.05   | 2.7489 |
| H-7 → L+10 | 2.80 | 9.27  | 1.29 | 2.6223 | 3.0361 | 2.7307 |
| H-7 → L+11 | 2.71 | 17.65 | 1.51 | 2.6302 | 3.0459 | 2.7428 |
| <hr/>      |      |       |      |        |        |        |
| H-8 → L    | 2.50 | 10.19 | 0.68 | 2.6639 | 3.0753 | 2.7749 |
| H-8 → L+1  | 2.55 | 13.51 | 0.73 | 2.6617 | 3.0735 | 2.774  |
| H-8 → L+2  | 2.56 | 16.07 | 0.24 | 2.6600 | 3.0735 | 2.7712 |
| H-8 → L+3  | 2.61 | 12.14 | 1.41 | 2.6618 | 3.0755 | 2.7731 |

|            |      |       |       |        |        |        |
|------------|------|-------|-------|--------|--------|--------|
| H-8 → L+4  | 2.45 | 10.74 | 1.05  | 2.6464 | 3.057  | 2.7547 |
| H-8 → L+5  | 2.67 | 17.12 | 4.06  | 2.6427 | 3.0575 | 2.7599 |
| H-8 → L+6  | 3.20 | 7.88  | 1.00  | 2.6570 | 3.0698 | 2.7651 |
| H-8 → L+7  | 3.05 | 10.71 | 0.62  | 2.6599 | 3.0727 | 2.7677 |
| H-8 → L+8  | 2.79 | 20.19 | 3.16  | 2.6468 | 3.063  | 2.7616 |
| H-8 → L+9  | 2.78 | 20.39 | 5.03  | 2.6524 | 3.0673 | 2.7695 |
| H-8 → L+10 | 2.92 | 8.85  | 0.93  | 2.6378 | 3.0545 | 2.7537 |
| H-8 → L+11 | 3.01 | 18.64 | 3.80  | 2.6369 | 3.0584 | 2.7583 |
| <hr/>      |      |       |       |        |        |        |
| H-9 → L    | 2.78 | 14.14 | 1.88  | 2.6550 | 3.0662 | 2.7684 |
| H-9 → L+1  | 2.58 | 11.19 | 2.50  | 2.6576 | 3.0687 | 2.7702 |
| H-9 → L+2  | 2.64 | 14.20 | 1.15  | 2.6535 | 3.0667 | 2.7664 |
| H-9 → L+3  | 2.74 | 13.14 | 2.88  | 2.6601 | 3.0731 | 2.7711 |
| H-9 → L+4  | 2.76 | 12.18 | 0.82  | 2.6453 | 3.0557 | 2.7546 |
| H-9 → L+5  | 4.03 | 14.55 | 13.87 | 2.6552 | 3.0684 | 2.7709 |
| H-9 → L+6  | 4.86 | 12.78 | 11.61 | 2.6245 | 3.0393 | 2.7401 |
| H-9 → L+7  | 2.74 | 10.55 | 2.88  | 2.6603 | 3.0732 | 2.7695 |
| H-9 → L+8  | 3.80 | 20.69 | 4.17  | 2.6386 | 3.0548 | 2.7551 |
| H-9 → L+9  | 3.24 | 20.24 | 3.71  | 2.6570 | 3.0719 | 2.7743 |
| H-9 → L+10 | 3.11 | 8.88  | 3.69  | 2.6317 | 3.0483 | 2.7488 |
| H-9 → L+11 | 3.87 | 17.01 | 8.74  | 2.6413 | 3.0596 | 2.7609 |
| <hr/>      |      |       |       |        |        |        |
| H-10 → L   | 2.57 | 13.49 | 1.53  | 2.6352 | 3.0501 | 2.7433 |
| H-10 → L+1 | 2.71 | 11.58 | 1.91  | 2.6381 | 3.0535 | 2.7454 |
| H-10 → L+2 | 2.67 | 12.84 | 2.19  | 2.6325 | 3.0493 | 2.7405 |
| H-10 → L+3 | 2.52 | 16.22 | 1.29  | 2.6360 | 3.0536 | 2.743  |
| H-10 → L+4 | 2.68 | 12.18 | 1.51  | 2.6240 | 3.0376 | 2.7286 |
| H-10 → L+5 | 2.87 | 13.53 | 2.83  | 2.6400 | 3.0577 | 2.7496 |

|                         |      |       |       |        |        |        |
|-------------------------|------|-------|-------|--------|--------|--------|
| H-10 $\rightarrow$ L+6  | 3.02 | 14.21 | 3.39  | 2.6253 | 3.0423 | 2.7347 |
| H-10 $\rightarrow$ L+7  | 2.77 | 13.42 | 1.43  | 2.6333 | 3.0524 | 2.7408 |
| H-10 $\rightarrow$ L+8  | 2.84 | 20.85 | 4.12  | 2.6212 | 3.0404 | 2.7327 |
| H-10 $\rightarrow$ L+9  | 3.09 | 19.26 | 3.18  | 2.6366 | 3.0554 | 2.7491 |
| H-10 $\rightarrow$ L+10 | 3.01 | 8.86  | 2.48  | 2.6072 | 3.027  | 2.7208 |
| H-10 $\rightarrow$ L+11 | 3.01 | 18.46 | 2.85  | 2.6305 | 3.0521 | 2.7435 |
| <hr/>                   |      |       |       |        |        |        |
| H-11 $\rightarrow$ L    | 3.71 | 13.63 | 15.36 | 2.6568 | 3.066  | 2.7643 |
| H-11 $\rightarrow$ L+1  | 2.48 | 8.36  | 6.92  | 2.6459 | 3.057  | 2.7569 |
| H-11 $\rightarrow$ L+2  | 3.76 | 13.59 | 14.45 | 2.6523 | 3.0633 | 2.7581 |
| H-11 $\rightarrow$ L+3  | 3.94 | 12.93 | 16.45 | 2.6543 | 3.0656 | 2.7613 |
| H-11 $\rightarrow$ L+4  | 2.73 | 14.73 | 3.45  | 2.6386 | 3.0488 | 2.7458 |
| H-11 $\rightarrow$ L+5  | 4.21 | 12.38 | 18.35 | 2.6550 | 3.0665 | 2.7652 |
| H-11 $\rightarrow$ L+6  | 5.31 | 12.49 | 15.77 | 2.6470 | 3.0588 | 2.7561 |
| H-11 $\rightarrow$ L+7  | 3.65 | 11.94 | 15.44 | 2.6439 | 3.0558 | 2.7532 |
| H-11 $\rightarrow$ L+8  | 4.06 | 19.60 | 14.68 | 2.6449 | 3.0581 | 2.7541 |
| H-11 $\rightarrow$ L+9  | 4.96 | 18.03 | 16.60 | 2.6551 | 3.0683 | 2.7681 |
| H-11 $\rightarrow$ L+10 | 4.03 | 5.57  | 15.11 | 2.6408 | 3.0539 | 2.7493 |
| H-11 $\rightarrow$ L+11 | 3.42 | 19.97 | 9.17  | 2.6206 | 3.0354 | 2.7367 |
| <hr/>                   |      |       |       |        |        |        |
| Ground state            | -    | 14.51 | 0.15  | 2.8582 | 3.3037 | 2.9957 |
| <hr/> <hr/>             |      |       |       |        |        |        |

Table S6: Particle-hole state, excitation energy ( $E_{ex}$ , magnetic anisotropy energy (MAE), Dipole moment, Average spin-charge on Cr sites for  $\text{CrCl}_3$  for singly excited states spin flip particle-hole state.

| Transition            | E (eV) | MAE (K) | Dipole (D) | Spin charge (e) |          |        |
|-----------------------|--------|---------|------------|-----------------|----------|--------|
|                       |        |         |            | Integrated      | Mulliken | Lowdin |
| H $\rightarrow$ L     | 2.45   | 10.72   | 0.93       | 2.5917          | 2.959    | 2.6838 |
| H $\rightarrow$ L+1   | 2.32   | 9.86    | 0.88       | 2.5915          | 2.9593   | 2.6848 |
| H $\rightarrow$ L+2   | 2.46   | 8.28    | 1.51       | 2.5892          | 2.9586   | 2.6818 |
| H $\rightarrow$ L+3   | 2.43   | 11.42   | 2.10       | 2.5903          | 2.9605   | 2.6838 |
| H $\rightarrow$ L+4   | 2.22   | 5.06    | 1.59       | 2.5785          | 2.9457   | 2.6688 |
| H $\rightarrow$ L+5   | 2.49   | 12.32   | 2.88       | 2.5885          | 2.9581   | 2.6854 |
| H $\rightarrow$ L+6   | 2.21   | 16.93   | 0.94       | 2.5752          | 2.9441   | 2.6708 |
| H $\rightarrow$ L+7   | 2.34   | 8.72    | 0.97       | 2.5829          | 2.9532   | 2.6776 |
| H $\rightarrow$ L+8   | 2.61   | 4.27    | 0.99       | 2.5898          | 2.9594   | 2.6878 |
| H $\rightarrow$ L+9   | 2.54   | 15.56   | 1.92       | 2.5769          | 2.9478   | 2.6727 |
| H $\rightarrow$ L+10  | 2.75   | 8.81    | 3.18       | 2.5717          | 2.9427   | 2.6692 |
| H $\rightarrow$ L+11  | 2.64   | 12.57   | 0.97       | 2.5804          | 2.9537   | 2.6791 |
| H-1 $\rightarrow$ L   | 2.36   | 9.87    | 1.07       | 2.5906          | 2.9579   | 2.683  |
| H-1 $\rightarrow$ L+1 | 2.32   | 10.97   | 1.00       | 2.5902          | 2.9576   | 2.6826 |
| H-1 $\rightarrow$ L+2 | 2.41   | 9.74    | 2.35       | 2.5893          | 2.9588   | 2.6823 |
| H-1 $\rightarrow$ L+3 | 2.40   | 12.63   | 1.40       | 2.5889          | 2.9587   | 2.6823 |
| H-1 $\rightarrow$ L+4 | 2.27   | 4.41    | 2.17       | 2.5788          | 2.9459   | 2.6686 |
| H-1 $\rightarrow$ L+5 | 2.50   | 15.31   | 1.99       | 2.5914          | 2.9605   | 2.687  |
| H-1 $\rightarrow$ L+6 | 2.48   | 15.86   | 2.15       | 2.5781          | 2.9465   | 2.6721 |
| H-1 $\rightarrow$ L+7 | 2.26   | 17.70   | 1.20       | 2.5773          | 2.9469   | 2.6725 |
| H-1 $\rightarrow$ L+8 | 2.77   | 5.35    | 2.38       | 2.5904          | 2.9604   | 2.6877 |
| H-1 $\rightarrow$ L+9 | 2.53   | 13.98   | 0.63       | 2.5754          | 2.9462   | 2.671  |



|                        |      |       |      |        |        |        |
|------------------------|------|-------|------|--------|--------|--------|
| H-1 $\rightarrow$ L+10 | 2.63 | 8.24  | 1.95 | 2.5678 | 2.9384 | 2.664  |
| H-1 $\rightarrow$ L+11 | 2.48 | 10.34 | 1.65 | 2.5861 | 2.9574 | 2.684  |
| H-2 $\rightarrow$ L    | 2.27 | 9.94  | 0.57 | 2.5860 | 2.9517 | 2.6777 |
| H-2 $\rightarrow$ L+1  | 2.26 | 10.33 | 0.75 | 2.5855 | 2.9512 | 2.6773 |
| H-2 $\rightarrow$ L+2  | 2.29 | 9.40  | 0.48 | 2.5842 | 2.952  | 2.6763 |
| H-2 $\rightarrow$ L+3  | 2.29 | 12.48 | 0.47 | 2.5843 | 2.9527 | 2.6768 |
| H-2 $\rightarrow$ L+4  | 2.42 | 3.99  | 0.44 | 2.5747 | 2.9402 | 2.6632 |
| H-2 $\rightarrow$ L+5  | 2.47 | 14.14 | 0.34 | 2.5869 | 2.955  | 2.6817 |
| H-2 $\rightarrow$ L+6  | 2.62 | 16.79 | 2.52 | 2.5759 | 2.9433 | 2.6689 |
| H-2 $\rightarrow$ L+7  | 2.56 | 14.47 | 1.05 | 2.5762 | 2.944  | 2.6693 |
| H-2 $\rightarrow$ L+8  | 2.46 | 3.60  | 0.99 | 2.5867 | 2.9549 | 2.6832 |
| H-2 $\rightarrow$ L+9  | 2.47 | 10.98 | 0.61 | 2.5727 | 2.9418 | 2.6667 |
| H-2 $\rightarrow$ L+10 | 2.69 | 5.27  | 0.50 | 2.5695 | 2.9386 | 2.6626 |
| H-2 $\rightarrow$ L+11 | 2.68 | 11.74 | 0.34 | 2.5814 | 2.9517 | 2.6781 |
| H-3 $\rightarrow$ L    | 2.48 | 10.32 | 4.28 | 2.5817 | 2.949  | 2.6719 |
| H-3 $\rightarrow$ L+1  | 2.49 | 10.15 | 2.56 | 2.5826 | 2.9502 | 2.6725 |
| H-3 $\rightarrow$ L+2  | 2.47 | 10.37 | 2.23 | 2.5822 | 2.9523 | 2.6724 |
| H-3 $\rightarrow$ L+3  | 2.40 | 11.44 | 2.16 | 2.5790 | 2.9485 | 2.6703 |
| H-3 $\rightarrow$ L+4  | 2.29 | 3.39  | 0.92 | 2.5660 | 2.9325 | 2.6541 |
| H-3 $\rightarrow$ L+5  | 2.46 | 14.27 | 1.46 | 2.5826 | 2.9519 | 2.676  |
| H-3 $\rightarrow$ L+6  | 2.36 | 16.42 | 1.29 | 2.5699 | 2.9381 | 2.6621 |
| H-3 $\rightarrow$ L+7  | 2.37 | 14.51 | 0.55 | 2.5715 | 2.9405 | 2.6631 |
| H-3 $\rightarrow$ L+8  | 2.59 | 3.54  | 1.74 | 2.5802 | 2.949  | 2.6757 |
| H-3 $\rightarrow$ L+9  | 2.58 | 10.36 | 2.07 | 2.5666 | 2.9368 | 2.6598 |
| H-3 $\rightarrow$ L+10 | 2.63 | 3.87  | 2.40 | 2.5636 | 2.9337 | 2.6561 |
| H-3 $\rightarrow$ L+11 | 2.56 | 12.43 | 0.95 | 2.5755 | 2.9469 | 2.671  |

|                        |      |       |      |        |        |        |
|------------------------|------|-------|------|--------|--------|--------|
| H-4 $\rightarrow$ L    | 2.37 | 9.64  | 1.88 | 2.5787 | 2.9433 | 2.6702 |
| H-4 $\rightarrow$ L+1  | 2.53 | 10.68 | 5.19 | 2.5792 | 2.944  | 2.6707 |
| H-4 $\rightarrow$ L+2  | 2.78 | 8.83  | 7.09 | 2.5776 | 2.9444 | 2.6694 |
| H-4 $\rightarrow$ L+3  | 2.32 | 12.80 | 1.82 | 2.5759 | 2.943  | 2.6683 |
| H-4 $\rightarrow$ L+4  | 2.54 | 3.83  | 2.92 | 2.5662 | 2.9304 | 2.6548 |
| H-4 $\rightarrow$ L+5  | 2.68 | 14.09 | 2.63 | 2.5815 | 2.949  | 2.6758 |
| H-4 $\rightarrow$ L+6  | 2.75 | 15.40 | 4.72 | 2.5669 | 2.933  | 2.6594 |
| H-4 $\rightarrow$ L+7  | 2.61 | 15.33 | 1.10 | 2.5695 | 2.9363 | 2.6623 |
| H-4 $\rightarrow$ L+8  | 2.76 | 4.12  | 4.37 | 2.5797 | 2.9469 | 2.6757 |
| H-4 $\rightarrow$ L+9  | 2.53 | 12.07 | 2.36 | 2.5640 | 2.932  | 2.6583 |
| H-4 $\rightarrow$ L+10 | 2.71 | 4.84  | 1.58 | 2.5609 | 2.929  | 2.6545 |
| H-4 $\rightarrow$ L+11 | 2.80 | 10.86 | 2.87 | 2.5744 | 2.9436 | 2.6707 |
| <hr/>                  |      |       |      |        |        |        |
| H-5 $\rightarrow$ L    | 2.81 | 10.61 | 7.69 | 2.5790 | 2.9442 | 2.6703 |
| H-5 $\rightarrow$ L+1  | 2.28 | 10.25 | 1.61 | 2.5779 | 2.9432 | 2.6696 |
| H-5 $\rightarrow$ L+2  | 2.43 | 8.27  | 3.21 | 2.5765 | 2.9434 | 2.6684 |
| H-5 $\rightarrow$ L+3  | 2.68 | 11.48 | 7.07 | 2.5771 | 2.9449 | 2.6696 |
| H-5 $\rightarrow$ L+4  | 2.58 | 4.31  | 4.27 | 2.5669 | 2.9318 | 2.6555 |
| H-5 $\rightarrow$ L+5  | 2.86 | 13.41 | 6.13 | 2.5800 | 2.9476 | 2.6744 |
| H-5 $\rightarrow$ L+6  | 2.61 | 16.86 | 2.62 | 2.5699 | 2.9366 | 2.6626 |
| H-5 $\rightarrow$ L+7  | 2.96 | 12.97 | 6.43 | 2.5691 | 2.9366 | 2.6618 |
| H-5 $\rightarrow$ L+8  | 2.70 | 3.34  | 5.94 | 2.5784 | 2.9454 | 2.6749 |
| H-5 $\rightarrow$ L+9  | 2.64 | 12.26 | 4.71 | 2.5648 | 2.9334 | 2.6589 |
| H-5 $\rightarrow$ L+10 | 2.87 | 4.97  | 5.93 | 2.5597 | 2.9283 | 2.6538 |
| H-5 $\rightarrow$ L+11 | 3.01 | 11.62 | 6.09 | 2.5726 | 2.9427 | 2.669  |
| <hr/>                  |      |       |      |        |        |        |
| H-6 $\rightarrow$ L    | 2.48 | 9.94  | 3.84 | 2.5752 | 2.9398 | 2.6661 |
| H-6 $\rightarrow$ L+1  | 2.41 | 11.61 | 2.48 | 2.5762 | 2.9411 | 2.6676 |

|                        |      |       |      |        |        |        |
|------------------------|------|-------|------|--------|--------|--------|
| H-6 $\rightarrow$ L+2  | 2.29 | 9.57  | 0.85 | 2.5736 | 2.9404 | 2.6652 |
| H-6 $\rightarrow$ L+3  | 2.44 | 11.99 | 2.63 | 2.5741 | 2.9415 | 2.6663 |
| H-6 $\rightarrow$ L+4  | 2.55 | 4.46  | 3.39 | 2.5646 | 2.9291 | 2.6535 |
| H-6 $\rightarrow$ L+5  | 2.63 | 14.73 | 4.47 | 2.5777 | 2.9452 | 2.6717 |
| H-6 $\rightarrow$ L+6  | 2.82 | 15.50 | 4.96 | 2.5661 | 2.9327 | 2.6586 |
| H-6 $\rightarrow$ L+7  | 2.74 | 12.73 | 4.13 | 2.5672 | 2.934  | 2.6597 |
| H-6 $\rightarrow$ L+8  | 2.52 | 3.41  | 2.19 | 2.5755 | 2.9421 | 2.6716 |
| H-6 $\rightarrow$ L+9  | 2.68 | 9.38  | 3.10 | 2.5629 | 2.9316 | 2.6574 |
| H-6 $\rightarrow$ L+10 | 2.74 | 4.12  | 2.91 | 2.5608 | 2.9292 | 2.6542 |
| H-6 $\rightarrow$ L+11 | 2.74 | 8.22  | 2.84 | 2.5679 | 2.9372 | 2.6644 |
| <hr/>                  |      |       |      |        |        |        |
| H-7 $\rightarrow$ L    | 2.39 | 11.35 | 2.90 | 2.5758 | 2.9405 | 2.667  |
| H-7 $\rightarrow$ L+1  | 2.52 | 11.22 | 4.63 | 2.5760 | 2.9408 | 2.6677 |
| H-7 $\rightarrow$ L+2  | 2.46 | 9.14  | 2.62 | 2.5742 | 2.9416 | 2.666  |
| H-7 $\rightarrow$ L+3  | 2.43 | 11.49 | 1.75 | 2.5733 | 2.9405 | 2.6656 |
| H-7 $\rightarrow$ L+4  | 2.51 | 4.46  | 0.75 | 2.5633 | 2.9276 | 2.652  |
| H-7 $\rightarrow$ L+5  | 2.55 | 13.83 | 3.65 | 2.5758 | 2.9429 | 2.6704 |
| H-7 $\rightarrow$ L+6  | 2.71 | 15.34 | 1.80 | 2.5666 | 2.9332 | 2.6594 |
| H-7 $\rightarrow$ L+7  | 2.77 | 10.72 | 4.33 | 2.5659 | 2.9326 | 2.6584 |
| H-7 $\rightarrow$ L+8  | 2.72 | 3.24  | 3.58 | 2.5761 | 2.9433 | 2.6723 |
| H-7 $\rightarrow$ L+9  | 2.66 | 11.62 | 1.69 | 2.5622 | 2.9301 | 2.6562 |
| H-7 $\rightarrow$ L+10 | 2.79 | 4.79  | 1.10 | 2.5597 | 2.9279 | 2.654  |
| H-7 $\rightarrow$ L+11 | 2.90 | 11.92 | 3.24 | 2.5688 | 2.9385 | 2.6652 |
| <hr/>                  |      |       |      |        |        |        |
| H-8 $\rightarrow$ L    | 2.45 | 11.83 | 1.49 | 2.5806 | 2.95   | 2.6725 |
| H-8 $\rightarrow$ L+1  | 2.73 | 11.91 | 6.35 | 2.5799 | 2.9487 | 2.6721 |
| H-8 $\rightarrow$ L+2  | 2.52 | 9.89  | 0.45 | 2.5790 | 2.9506 | 2.6713 |
| H-8 $\rightarrow$ L+3  | 2.49 | 11.55 | 2.42 | 2.5779 | 2.9494 | 2.671  |

|                        |      |       |       |        |        |        |
|------------------------|------|-------|-------|--------|--------|--------|
| H-8 $\rightarrow$ L+4  | 2.50 | 5.65  | 1.24  | 2.5680 | 2.9362 | 2.6572 |
| H-8 $\rightarrow$ L+5  | 2.56 | 15.62 | 1.97  | 2.5804 | 2.9518 | 2.6758 |
| H-8 $\rightarrow$ L+6  | 2.68 | 15.38 | 3.05  | 2.5660 | 2.9342 | 2.6604 |
| H-8 $\rightarrow$ L+7  | 2.74 | 12.66 | 2.47  | 2.5716 | 2.9417 | 2.6651 |
| H-8 $\rightarrow$ L+8  | 2.74 | 1.72  | 2.42  | 2.5801 | 2.9515 | 2.6772 |
| H-8 $\rightarrow$ L+9  | 2.80 | 10.44 | 3.70  | 2.5661 | 2.9378 | 2.6608 |
| H-8 $\rightarrow$ L+10 | 2.77 | 4.18  | 2.71  | 2.5630 | 2.9344 | 2.6578 |
| H-8 $\rightarrow$ L+11 | 2.92 | 12.27 | 2.95  | 2.5744 | 2.9475 | 2.6717 |
| <hr/>                  |      |       |       |        |        |        |
| H-9 $\rightarrow$ L    | 3.30 | 7.18  | 11.08 | 2.5862 | 2.9502 | 2.6791 |
| H-9 $\rightarrow$ L+1  | 2.26 | 11.13 | 4.02  | 2.5862 | 2.9501 | 2.6786 |
| H-9 $\rightarrow$ L+2  | 3.08 | 9.88  | 10.09 | 2.5859 | 2.9516 | 2.6786 |
| H-9 $\rightarrow$ L+3  | 2.59 | 11.56 | 2.94  | 2.5845 | 2.9507 | 2.6773 |
| H-9 $\rightarrow$ L+4  | 2.53 | 4.69  | 1.69  | 2.5761 | 2.9398 | 2.6654 |
| H-9 $\rightarrow$ L+5  | 2.59 | 14.80 | 4.79  | 2.5881 | 2.9542 | 2.6826 |
| H-9 $\rightarrow$ L+6  | 2.69 | 16.59 | 3.08  | 2.5785 | 2.9441 | 2.6711 |
| H-9 $\rightarrow$ L+7  | 3.89 | 11.96 | 9.19  | 2.5772 | 2.9428 | 2.6702 |
| H-9 $\rightarrow$ L+8  | 4.34 | 6.61  | 15.07 | 2.5837 | 2.9516 | 2.6766 |
| H-9 $\rightarrow$ L+9  | 2.22 | 9.94  | 1.00  | 2.5743 | 2.9421 | 2.6693 |
| H-9 $\rightarrow$ L+10 | 4.67 | 5.68  | 10.86 | 2.5714 | 2.9388 | 2.6652 |
| H-9 $\rightarrow$ L+11 | 4.25 | 6.15  | 10.89 | 2.5800 | 2.9483 | 2.6739 |
| <hr/>                  |      |       |       |        |        |        |
| H-10 $\rightarrow$ L   | 2.57 | 10.48 | 5.49  | 2.5816 | 2.9444 | 2.6738 |
| H-10 $\rightarrow$ L+1 | 2.28 | 10.65 | 2.83  | 2.5812 | 2.944  | 2.6734 |
| H-10 $\rightarrow$ L+2 | 2.62 | 9.29  | 4.96  | 2.5795 | 2.9444 | 2.672  |
| H-10 $\rightarrow$ L+3 | 3.61 | 13.04 | 11.83 | 2.5779 | 2.9428 | 2.6712 |
| H-10 $\rightarrow$ L+4 | 2.50 | 4.49  | 3.70  | 2.5696 | 2.9324 | 2.6595 |
| H-10 $\rightarrow$ L+5 | 2.42 | 10.34 | 0.54  | 2.5874 | 2.9537 | 2.6814 |

|                         |      |       |       |        |        |        |
|-------------------------|------|-------|-------|--------|--------|--------|
| H-10 $\rightarrow$ L+6  | 2.37 | 11.35 | 0.85  | 2.5720 | 2.9369 | 2.6653 |
| H-10 $\rightarrow$ L+7  | 2.53 | 8.79  | 3.17  | 2.5657 | 2.9304 | 2.6606 |
| H-10 $\rightarrow$ L+8  | 4.21 | 2.93  | 11.64 | 2.5804 | 2.946  | 2.6772 |
| H-10 $\rightarrow$ L+9  | 3.91 | 11.04 | 13.03 | 2.5742 | 2.9412 | 2.6672 |
| H-10 $\rightarrow$ L+10 | 3.93 | 5.07  | 10.10 | 2.5681 | 2.9349 | 2.6609 |
| H-10 $\rightarrow$ L+11 | 2.45 | 10.48 | 2.71  | 2.5830 | 2.9512 | 2.6787 |
| <hr/>                   |      |       |       |        |        |        |
| H-11 $\rightarrow$ L    | 2.61 | 10.20 | 0.90  | 2.5847 | 2.9477 | 2.6761 |
| H-11 $\rightarrow$ L+1  | 2.66 | 11.16 | 3.92  | 2.5867 | 2.9498 | 2.6783 |
| H-11 $\rightarrow$ L+2  | 2.58 | 11.13 | 3.86  | 2.5757 | 2.9406 | 2.6697 |
| H-11 $\rightarrow$ L+3  | 2.68 | 12.85 | 1.92  | 2.5843 | 2.9499 | 2.6772 |
| H-11 $\rightarrow$ L+4  | 2.77 | 4.20  | 4.78  | 2.5736 | 2.9367 | 2.6641 |
| H-11 $\rightarrow$ L+5  | 2.88 | 14.10 | 2.52  | 2.5904 | 2.9564 | 2.6845 |
| H-11 $\rightarrow$ L+6  | 3.71 | 16.38 | 3.45  | 2.5778 | 2.943  | 2.6705 |
| H-11 $\rightarrow$ L+7  | 2.72 | 12.68 | 2.59  | 2.5720 | 2.9368 | 2.6666 |
| H-11 $\rightarrow$ L+8  | 3.15 | 3.20  | 2.92  | 2.5901 | 2.9566 | 2.6852 |
| H-11 $\rightarrow$ L+9  | 2.94 | 10.19 | 4.52  | 2.5620 | 2.9303 | 2.6602 |
| H-11 $\rightarrow$ L+10 | 2.98 | 5.83  | 2.76  | 2.5686 | 2.9351 | 2.6623 |
| H-11 $\rightarrow$ L+11 | 3.03 | 11.57 | 3.02  | 2.5852 | 2.9531 | 2.681  |
| <hr/>                   |      |       |       |        |        |        |
| Ground state            | -    | 1.58  | 0.26  | 2.8196 | 3.2079 | 2.9297 |
| <hr/> <hr/>             |      |       |       |        |        |        |
